# Supplementary material for: Evaluating Translational Efficiency of Noncanonical Amino Acids to Inform the Design of Druglike Peptide Libraries
Source: PubMed Central journal article supplement — ACS Chem Biol. 2023 Jan 6;18(1):81–90. doi: 10.1021/acschembio.2c00712 (PMC9872084; doi:10.1021/acschembio.2c00712), 2023-01-06
Supplement: cb2c00712_si_001.pdf [file cb2c00712_si_001.pdf]

## Supporting Information

### **Evaluating translational efficiency of noncanonical amino acids to inform the design of druglike peptide libraries**

Alix I Chant<sup>†</sup>, Manali S. Sawant<sup>†‡</sup>, Daniel J. Burdick<sup>‡</sup>, Jeffrey Tom<sup>†</sup>, Aimin Song<sup>†</sup>, and Christian N. Cunningham<sup>†\*</sup>

<sup>†</sup> Department of Peptide Therapeutics, Genentech, South San Francisco, California 94080, United States

<sup>‡</sup> Current Address: Department of Antibody and Protein Engineering, 23andMe, Inc., South San Francisco, California 94080, United States

<sup>‡</sup> Department of Discovery Chemistry, Genentech, South San Francisco, California 94080, United States

\* Email: [cunningham.christian@gene.com](mailto:cunningham.christian@gene.com)

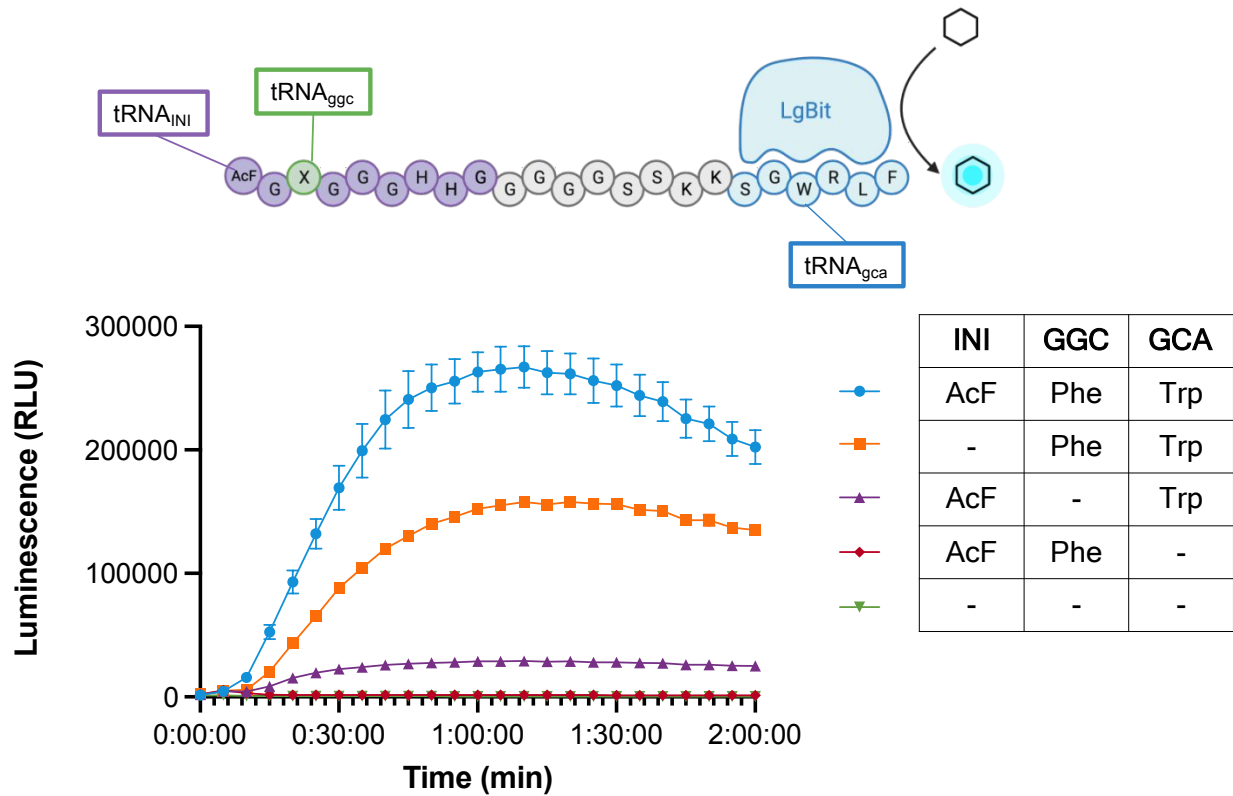

**Figure S1.** Luminescence signal in the FIT reaction of P3 is dependent on the aminoacylations of AcF-CAU-tRNA<sup>INI</sup>, Trp-GCA-tRNA<sup>Asn</sup>, and Phe-GCA-tRNA<sup>Asn</sup>. Luminescence production is negligible when Trp-GCA-tRNA<sup>Asn</sup> is omitted, and reduced in the absence of AcF-acylated CAU-tRNA<sup>INI</sup> or Phe-acylated GGC-tRNA<sup>Asn</sup>.

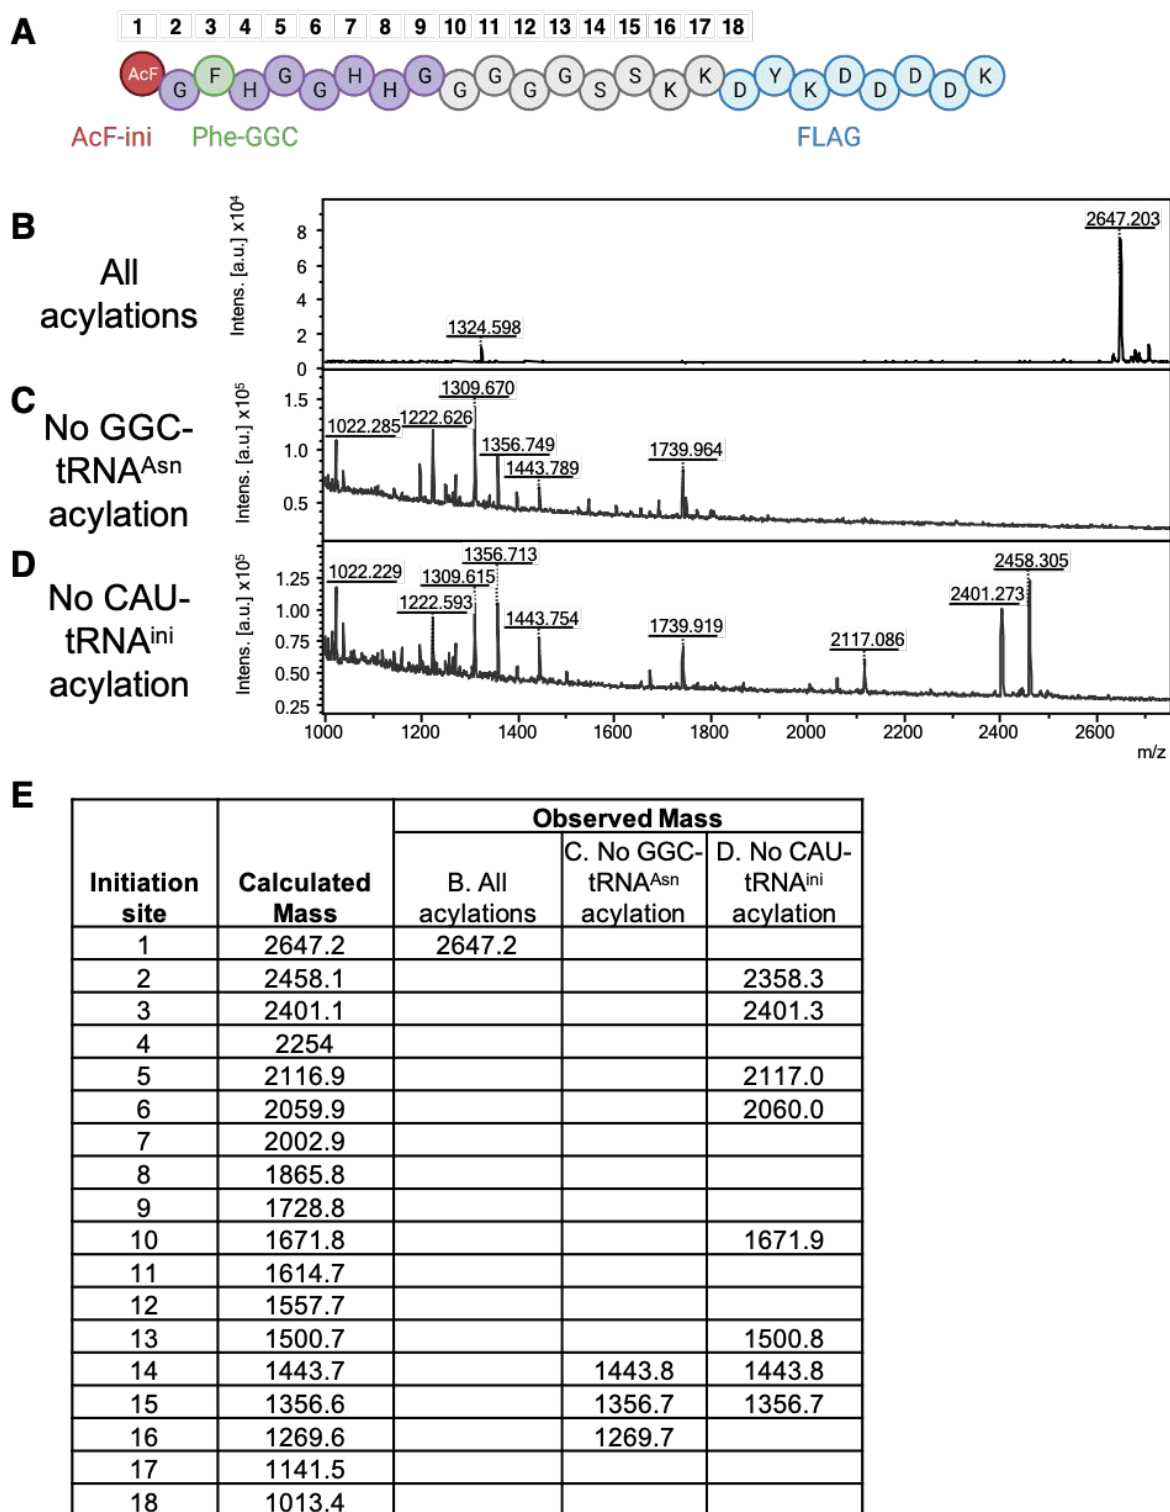

**Figure S2.** MALDI-TOF characterization of translation readthrough or reinitiation products. (A) FLAG-containing peptide sequence translated, with the sites of flexizyme-aminoacylated tRNAs noted. (B-D) MALDI-TOF spectra of peptides from IVT reactions under various acylation conditions. (E) Table of expected masses for peptide truncation products and observed masses in the spectra show in (B-D).

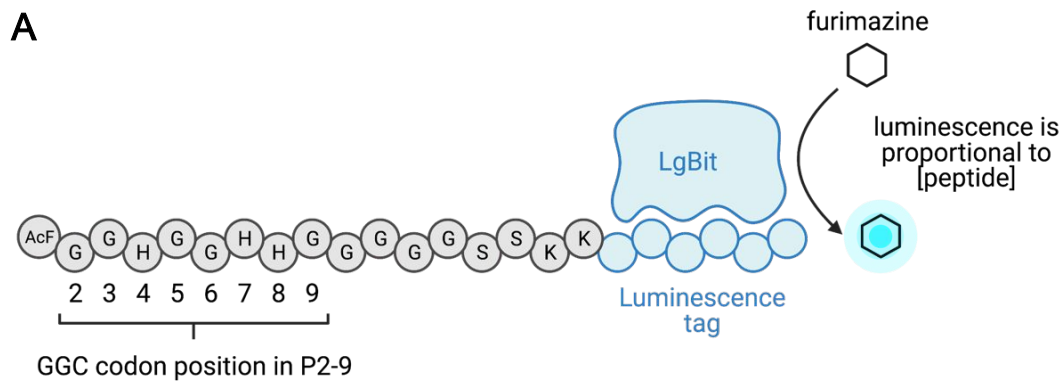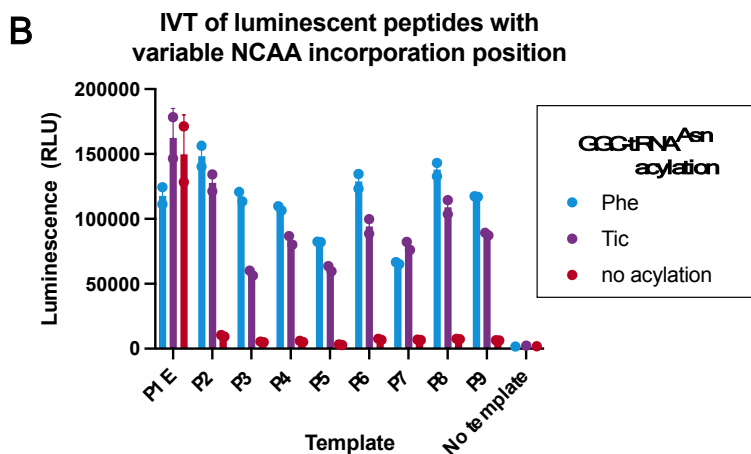

**Figure S3** Selection and validation of test sequences for luminescence-based translational efficiency assay. (A) Assay schematic for luminescence-based detection of translated peptides. (B) Positional scan of amino acid incorporation and the effect on luminescence signal when incorporating either Phe, Tic or non-acylated GGC-tRNA<sup>Asn</sup>. Template numberings correspond to positions annotated in Figure S3A.

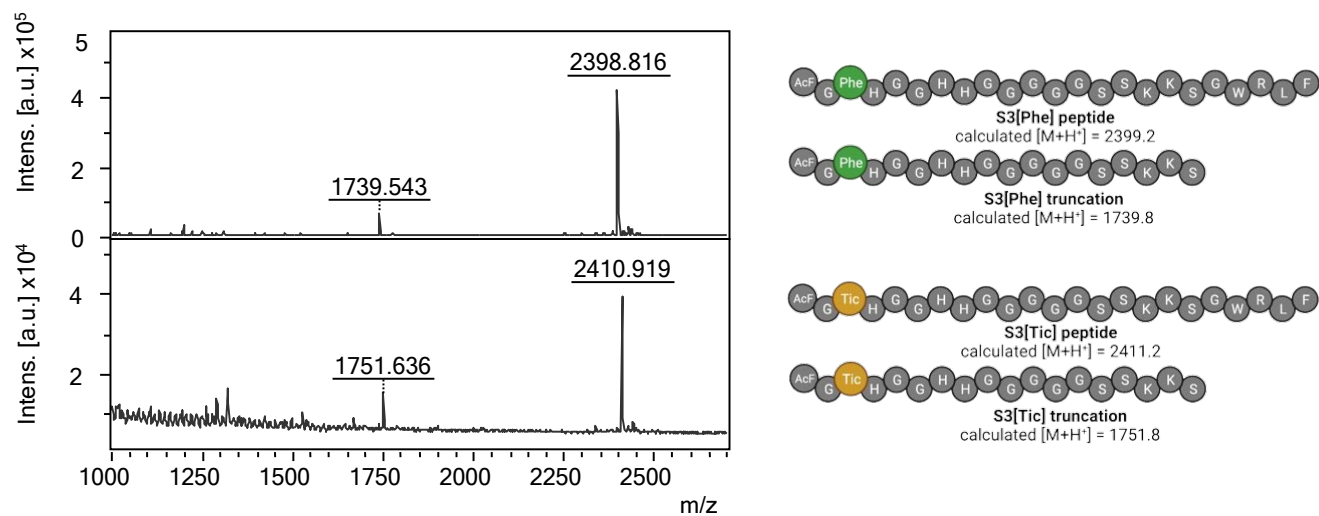

**Figure S4.** MALDI spectra from IVT reactions of **P3[Phe]** and **P3[Tic]**. Major products correspond to full-length expected product, with the only other observed product corresponding to truncation products after Ser18.

**Table S1.** Elongation amino acids tested in the study and their aminoacylation conditions. C = cyanomethyl ether, DNB = 3,5-dinitrobenzyl ester, ABT = amino-derivatized benzyl thioester H = HEPES pH 7.5; B = Bicine pH 9.0.

| General name                                         | Abbreviation  | Activation Group | Flexizyme | Buffer | (hr) |
|------------------------------------------------------|---------------|------------------|-----------|--------|------|
| L-Phenylalanine                                      | Phe           | CME              | eFx       | H      | 2    |
| L-Alanine                                            | Ala           | DNB              | dFx       | H      | 5    |
| L-Proline                                            | Pro           | DNB              | dFx       | H      | 2    |
| Glycine                                              | Gly           | DNB              | dFx       | H      | 2    |
| L-Tryptophan                                         | Trp           | CME              | eFx       | H      | 2    |
| L-Serine                                             | Ser           | DNB              | dFx       | H      | 5    |
| L-Threonine                                          | Thr           | DNB              | dFx       | H      | 5    |
| L-Tyrosine                                           | Tyr           | CME              | eFx       | H      | 2    |
| L-Cysteine                                           | Cys           | DNB              | dFx       | B      | 2    |
| D-Phenylalanine                                      | D-Phe         | CME              | eFx       | H      | 5    |
| D-Alanine                                            | D-Ala         | DNB              | dFx       | H      | 5    |
| D-Proline                                            | D-Pro         | DNB              | dFx       | H      | 5    |
| D-Tyrosine                                           | D-Tyr         | CME              | eFx       | H      | 5    |
| D-Cysteine                                           | D-Cys         | DNB              | dFx       | H      | 5    |
| L-Norleucine                                         | Nle           | DNB              | dFx       | H      | 5    |
| (S)-2-Aminoheptanoic acid                            | Ahp           | DNB              | dFx       | H      | 5    |
| $\beta$ -Cyclohexyl-L-alanine                        | Cha           | DNB              | dFx       | H      | 5    |
| $\alpha$ -Aminoisobutyric acid                       | Aib           | DNB              | dFx       | H      | 5    |
| 1-Aminocyclopropane-1-carboxylic acid                | Acp           | DNB              | dFx       | H      | 5    |
| (S)-1,2,3,4-Tetrahydroisoquinoline-3-carboxylic acid | Tic           | ABT              | aFx       | H      | 2    |
| L-4-methoxy-Phe                                      | F4m           | CME              | eFx       | B      | 2    |
| L-Diphenylalanine                                    | DiF           | CME              | eFx       | H      | 2    |
| 4-Phenyl-L-phenylalanine, Biphenylalanine            | Bip           | CME              | eFx       | H      | 5    |
| Ser(OMe)                                             | SOM           | DNB              | dFx       | B      | 2    |
| Thr(OMe)                                             | TOM           | DNB              | dFx       | B      | 2    |
| L-4-thiazolyl-Ala                                    | 4TzA          | DNB              | dFx       | B      | 2    |
| $\delta$ -pyrrolidyl-L-Asp                           | PyD           | DNB              | dFx       | H      | 5    |
| $\beta$ -2-(S)-Homo-Phenylalanine                    | $\beta^2$ Phe | CME              | eFx       | B      | 2    |
| $\beta$ -2-(S)-Homo-Leucine                          | $\beta^2$ Leu | DNB              | dFx       | B      | 5    |
| $\beta$ -2-(S)-Homo-Valine                           | $\beta^2$ Val | DNB              | dFx       | B      | 18   |
| $\gamma$ -Glycine                                    | $\gamma$ Gly  | DNB              | dFx       | B      | 2    |

|                                                                      |                   |     |     |   |    |
|----------------------------------------------------------------------|-------------------|-----|-----|---|----|
| N-Methyl-L-phenylalanine                                             | MeF               | CME | eFx | H | 5  |
| N-Methyl-L-alanine                                                   | MeA               | DNB | dFx | H | 5  |
| N-Methyl-L-norleucine                                                | MeNle             | DNB | dFx | H | 5  |
| N-Methyl-L-glycine (Sarcosine)                                       | Sar               | DNB | dFx | H | 2  |
| N-(2-Phenylethyl)-glycine                                            | PEtG              | ABT | aFx | H | 2  |
| Cyclopropyl-methyl-glycine                                           | CpmG              | DNB | dFx | B | 2  |
| N-n-Propyl-glycine                                                   | PrG               | DNB | dFx | B | 2  |
| 3-[(1-pyrenylacetyl)amino]-L-alanine                                 | Dap(pyr)          | CME | eFx | H | 16 |
| 3-[[[(7-methoxy-2-oxo-2H-1-benzopyran-3-yl)carbonyl]amino]-L-alanine | Dap(Cou)          | CME | eFx | H | 2  |
| 3-[[[(7-Nitro-2,1,3-benzoxadiazol-4-yl)amino]-L-alanine              | Dap(NBD)          | DNB | aFx | H | 16 |
| L-Propargyl-Glycine                                                  | PropG             | DNB | dFx | H | 2  |
| L-homopropargylglycine                                               | hPropG            | DNB | dFx | H | 2  |
| L-bishomopropargylglycine                                            | hhPropG           | DNB | dFx | H | 2  |
| 4-Ethynyl-L-phenylalanine                                            | Epa               | CME | eFx | B | 2  |
| L-Azido-Alanine                                                      | AN <sub>3</sub>   | DNB | dFx | B | 2  |
| L-Azido-Homo-Alanine                                                 | hAN <sub>3</sub>  | DNB | dFx | H | 2  |
| L-Azido-Ornithine                                                    | OrnN <sub>3</sub> | DNB | dFx | B | 2  |
| L-Azido-Lysine                                                       | LysN <sub>3</sub> | DNB | dFx | B | 2  |
| Biocytin                                                             | KBio              | DNB | dFx | B | 2  |
| 4-Benzoyl-L-phenylalanine                                            | Bpa               | CME | eFx | H | 5  |

**Table S2.** Initiator amino acids tested in the study and their aminoacylation conditions. H = HEPES pH 7.5; B = Bicine pH 9.0.

| <b>General name</b>            | <b>Abbreviation</b> | <b>Activation Group</b> | <b>Flexizyme</b> | <b>Buffer</b> | <b>(hr)</b> |
|--------------------------------|---------------------|-------------------------|------------------|---------------|-------------|
| N-Acetyl-L-phenylalanine       | AcF                 | CME                     | eFx              | H             | 2           |
| N-Acetyl-L-alanine             | AcA                 | DNB                     | dFx              | B             | 5           |
| N-Chloroacetyl-L-phenylalanine | ClAcF               | CME                     | eFx              | H             | 2           |
| N-Chloroacetyl-L-alanine       | ClAcA               | DNB                     | dFx              | B             | 2           |
| N-Chloroacetyl-L-tyrosine      | ClAcY               | CME                     | eFx              | H             | 2           |
| N-Chloroacetyl-D-phenylalanine | ClAcf               | CME                     | eFx              | H             | 2           |
| N-Chloroacetyl-D-alanine       | ClAca               | DNB                     | dFx              | B             | 5           |
| N-Chloroacetyl-D-tyrosine      | ClAcy               | CME                     | eFx              | H             | 2           |
| N-Biotinyl-L-phenylalanine     | BtnPhe              | CME                     | dFx              | H             | 3           |



## Translation vs. acylation yield

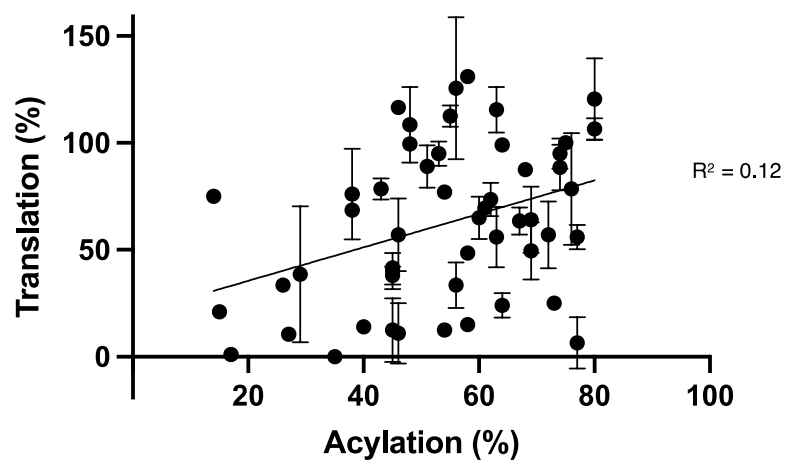

**Figure S5.** Translation efficiency vs acylation efficiency for all elongation amino acids tested in this study. No correlation is observed between acylation and translation efficiency ( $R^2 = 0.12$ ).

**Table S3.** Theoretical diversities and calculated fractions of competent templates of the L8 and L14 library pools when translated with limited amino acid pools (See Figure 5B).

| #aa | L8-HiBit217        |             | L14-HiBit-217         |             |
|-----|--------------------|-------------|-----------------------|-------------|
|     | Diversity          | % competent | Diversity             | % competent |
| 15  | $1.70 \times 10^7$ | 100%        | $2.80 \times 10^{14}$ | 100%        |
| 14  | $1.10 \times 10^7$ | 68%         | $1.30 \times 10^{14}$ | 46%         |
| 13  | $7.50 \times 10^6$ | 45%         | $5.70 \times 10^{13}$ | 20%         |
| 12  | $4.80 \times 10^6$ | 29%         | $2.30 \times 10^{13}$ | 8%          |
| 11  | $3.00 \times 10^6$ | 18%         | $8.90 \times 10^{12}$ | 3%          |
| 10  | $1.80 \times 10^6$ | 11%         | $3.10 \times 10^{12}$ | 1%          |
| 9   | $1.00 \times 10^6$ | 6.00%       | $1.00 \times 10^{12}$ | 0.40%       |
| 8   | $5.30 \times 10^5$ | 3.20%       | $2.80 \times 10^{11}$ | 0.10%       |
| 7   | $2.60 \times 10^5$ | 1.60%       | $6.90 \times 10^{10}$ | 0.02%       |
| 6   | $1.20 \times 10^5$ | 0.70%       | $1.40 \times 10^{10}$ | 0.01%       |

**Table S4.** Quantitation of library concentrations after IVT, as measured against a HiBit217 standard.

| Scaffold     | Codon table        | Final Concentration ( $\mu\text{M}$ ) |
|--------------|--------------------|---------------------------------------|
| L8-HiBit217  | Natural            | 17.1                                  |
| L8-HiBit217  | N-methyl           | 16.3                                  |
| L8-HiBit217  | Low IVT efficiency | 10.4                                  |
| L14-HiBit217 | Natural            | 9.0                                   |
| L14-HiBit217 | N-methyl           | 9.0                                   |
| L14-HiBit217 | Low IVT efficiency | 7.2                                   |

## Characterization data of new compounds

### $^1\text{H}$ NMR spectrum of DiF-CME

Cyanomethyl (S)-2-amino-3,3-diphenylpropanoate hydrochloride (**DiF-CME**). White solid. Yield 72%.  $^1\text{H}$  NMR (400 MHz,  $\text{DMSO-}d_6$ )  $\delta$  (ppm) 8.89 (s, br, 2H), 7.56 - 7.54 (m, 2H), 7.36 - 7.19 (m, 8H), 5.08 (d,  $J = 11.2$  Hz, 1H), 4.80 (q,  $J = 12.0$  Hz, 2H), 4.37 (d,  $J = 11.2$  Hz, 1H). ESI-MS  $[\text{M}+\text{H}]^+$  calcd. 281.1. found 280.9.

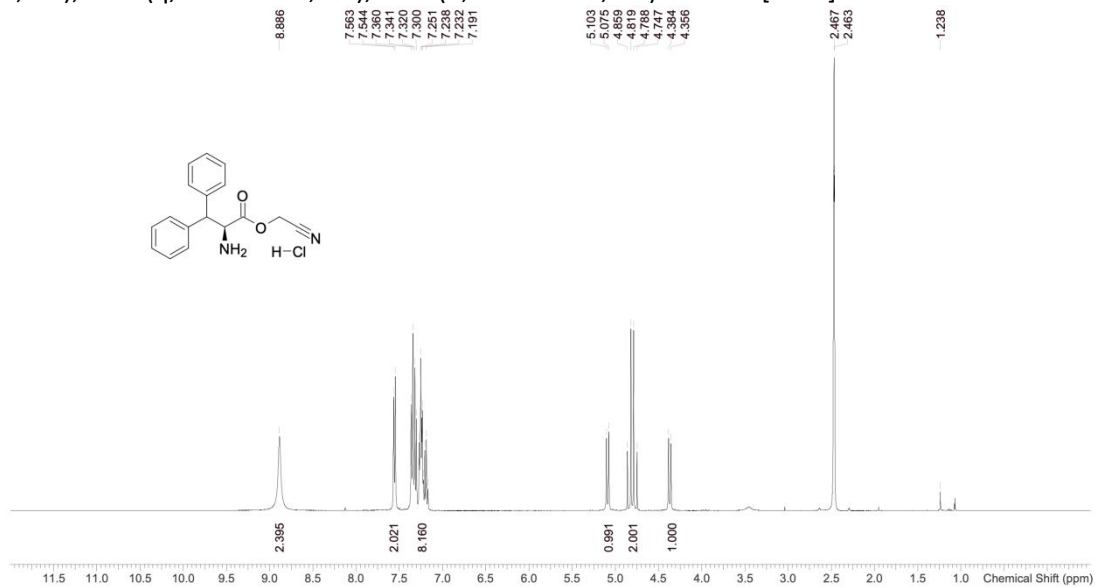

### Analytical HPLC spectrum of DiF-CME

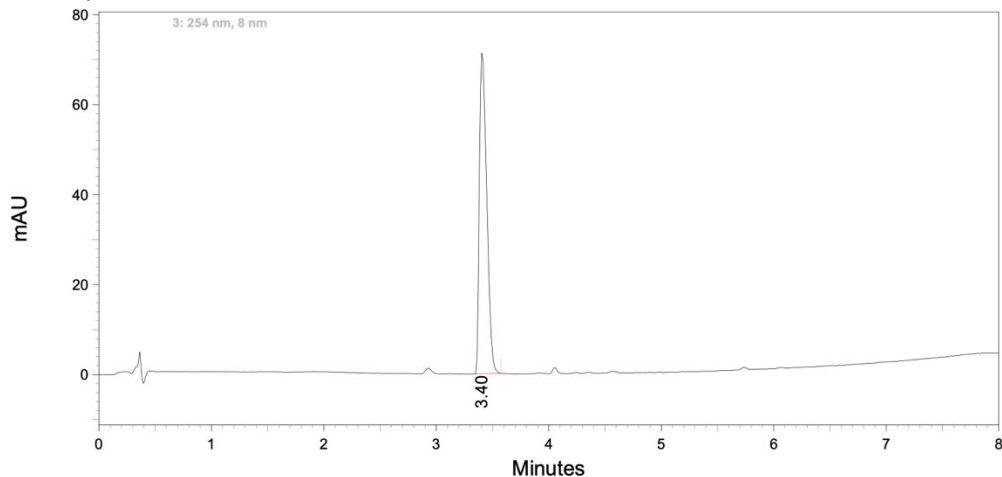

### ESI-MS spectrum of DiF-CME

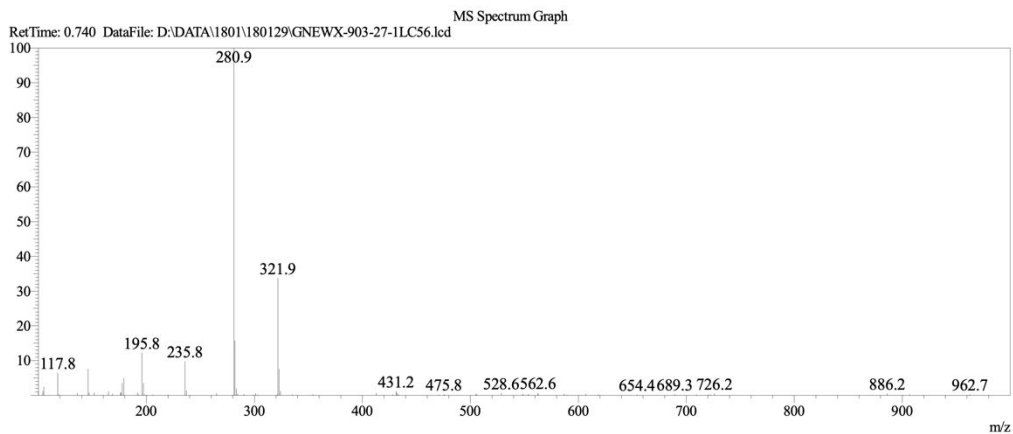

<sup>1</sup>H NMR spectrum of **AN<sub>3</sub>-DNB**

3,5-Dinitrobenzyl (S)-2-amino-3-azidopropanoate hydrochloride (**AN<sub>3</sub>-DNB**). White solid. Yield 93%. <sup>1</sup>H NMR (400 MHz, DMSO-*d*<sub>6</sub>) δ (ppm) 8.84 (t, *J* = 2.0 Hz, 1H), 8.77 (d, *J* = 2.0 Hz, 2H), 8.74 (s, 2H), 5.56 (d, *J* = 3.6 Hz, 2H), 4.56 (t, *J* = 4.0 Hz, 1H), 4.06 (dd, *J* = 13.6, 4.0 Hz, 1H), 3.94 (dd, *J* = 13.6, 4.0 Hz, 1H). ESI-MS [M+H]<sup>+</sup> calcd. 311.1. found 310.9.

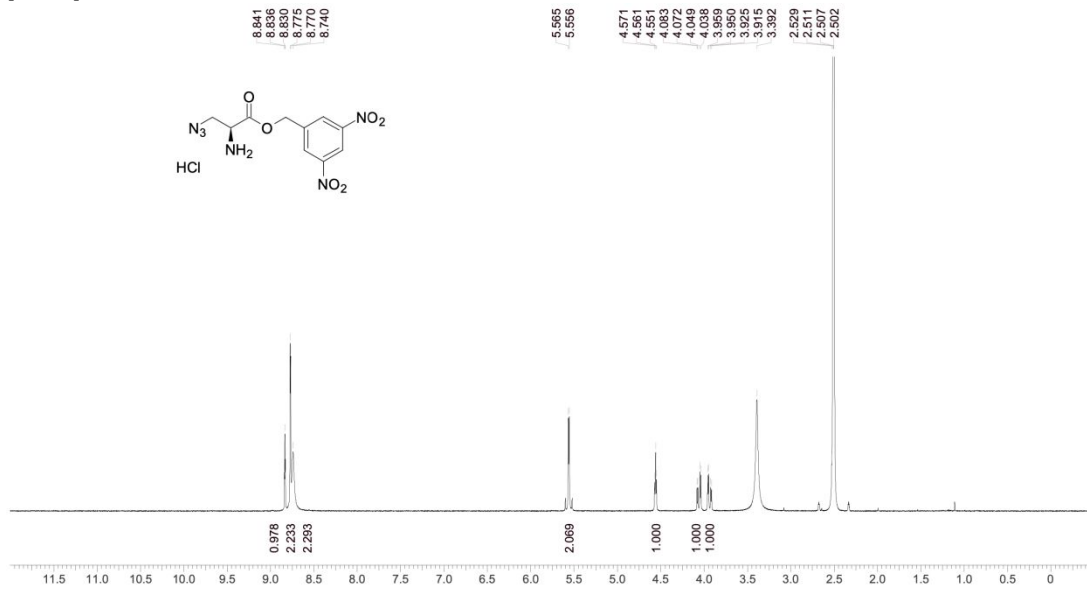

### Analytical HPLC spectrum of AN<sub>3</sub>-DNB

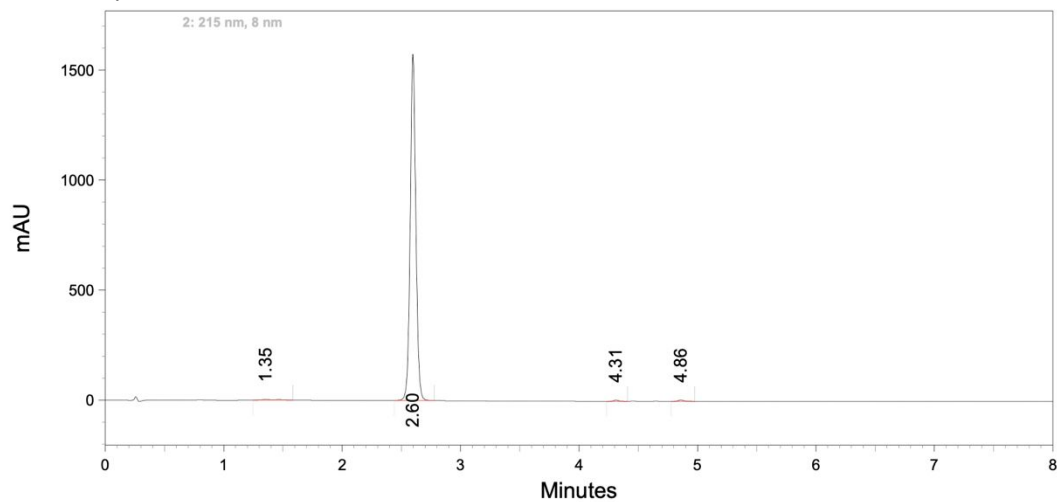

### ESI-MS spectrum of AN<sub>3</sub>-DNB

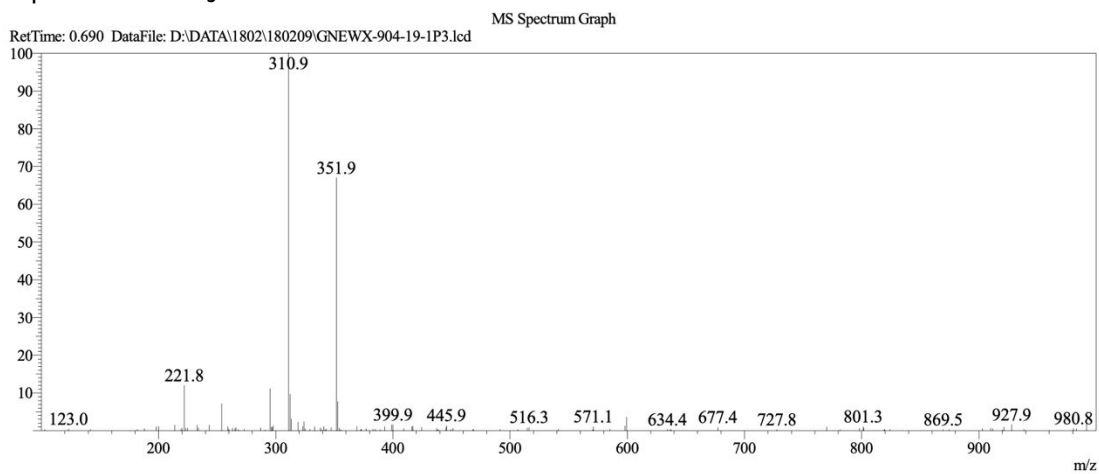

### <sup>1</sup>H NMR spectrum of **hhPropG-DNB**

3,5-Dinitrobenzyl (S)-2-aminohept-6-ynoate hydrochloride (**hhPropG-DNB**). Yellow solid. Yield 81%. <sup>1</sup>H NMR (400 MHz, DMSO-*d*<sub>6</sub>) δ (ppm) 8.83 (t, *J* = 2.0 Hz, 1H), 8.76 (d, *J* = 2.0 Hz, 2H), 8.66 (s, br 3H), 5.52 (s, 2H), 4.20 (t, *J* = 2.4 Hz, 1H), 2.80 (t, *J* = 2.8 Hz, 1H), 2.22 - 2.18 (m, 2H), 1.97 - 1.90 (m, 2H), 1.64 - 1.49 (m, 2H). ESI-MS [M+H]<sup>+</sup> calcd. 322.1. found 321.9.

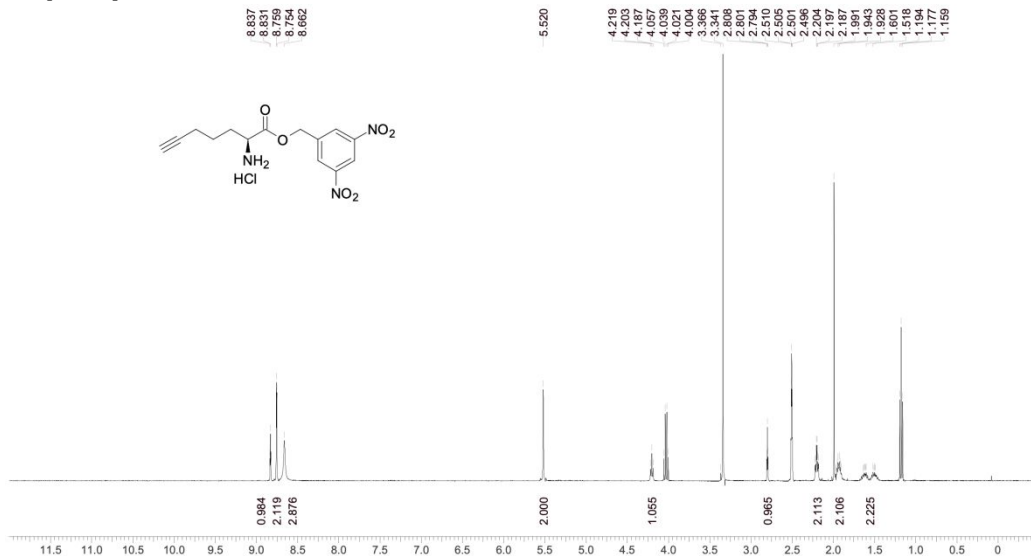

### Analytical HPLC spectrum of **hhPropG-DNB**

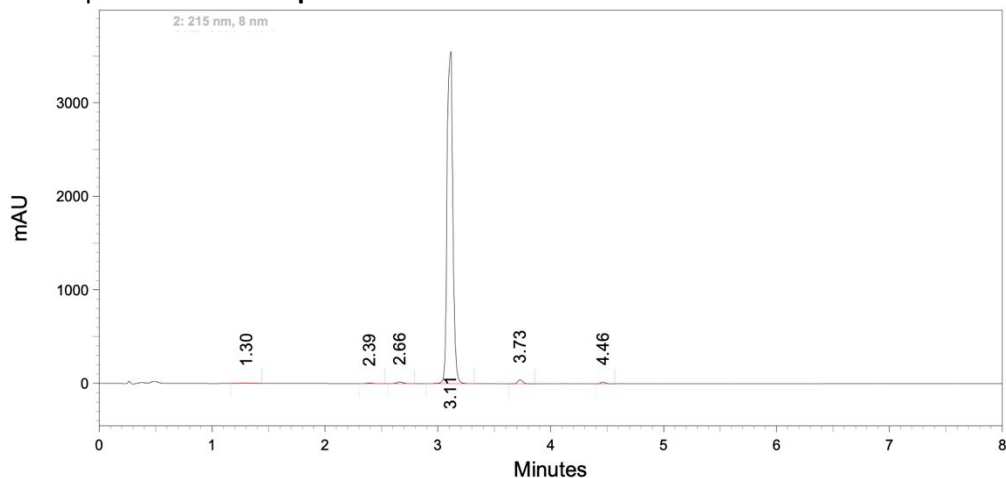

### ESI-MS spectrum of **hhPropG-DNB**

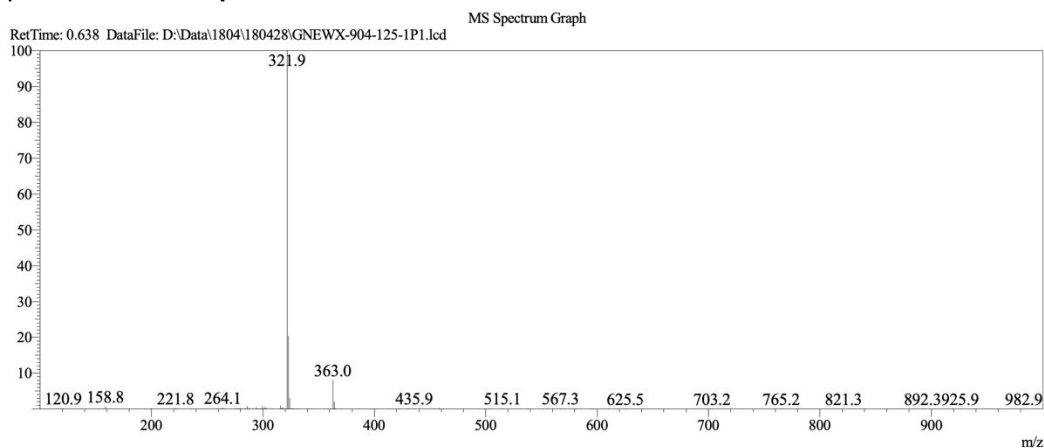

### <sup>1</sup>H NMR spectrum of **CpmG-DNB**

3,5-Dinitrobenzyl (cyclopropylmethyl)glycinate hydrochloride (**CpmG-DNB**). White solid. Yield 79%. <sup>1</sup>H NMR (400 MHz, DMSO-*d*<sub>6</sub>) δ (ppm) 9.39 (s, br 2H), 8.85 - 8.81 (m, 1H), 8.77 - 8.73 (m, 2H), 5.52 (s, 2H), 4.14 (s, 2H), 2.87 (d, *J* = 6.8 Hz, 2H), 1.08 - 1.05 (m, 1H), 0.60 - 0.55 (m, 2H), 0.37 - 0.33 (m, 2H). ESI-MS [M+H]<sup>+</sup> calcd. 310.1. found 310.2.

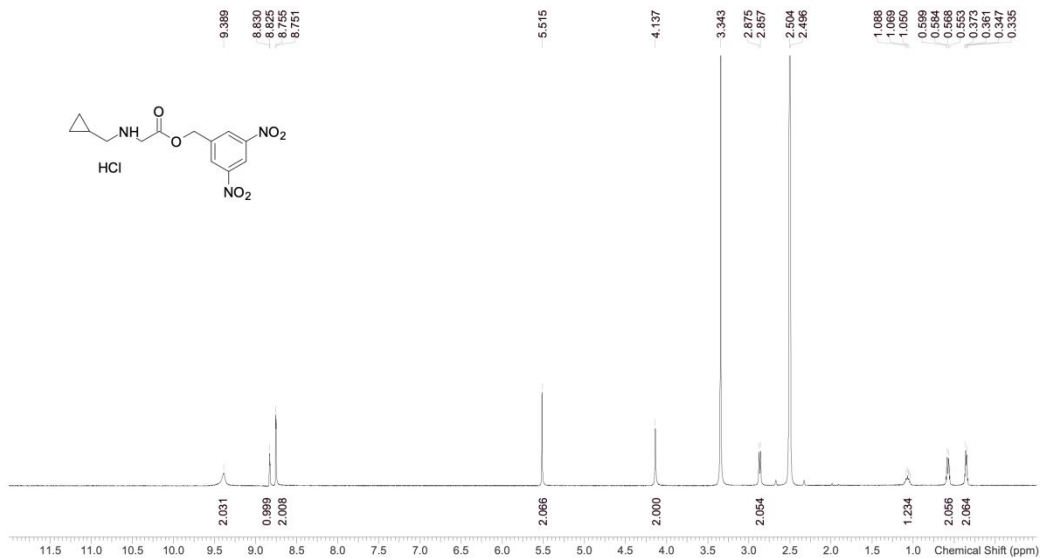

### Analytical HPLC spectrum of **CpmG-DNB**

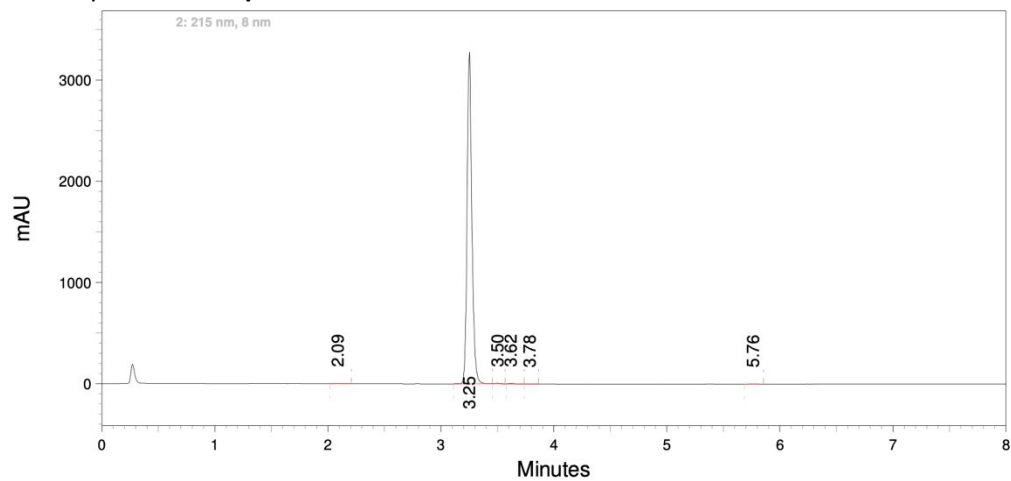

### ESI-MS spectrum of **CpmG-DNB**

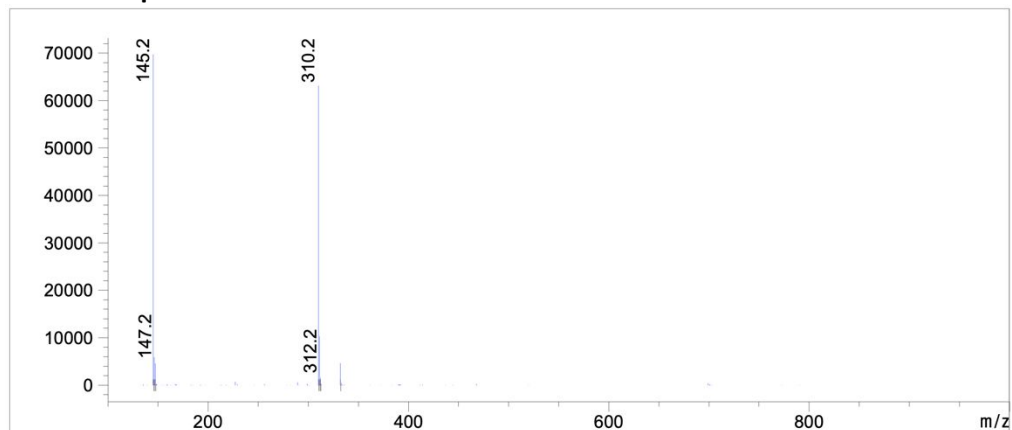

<sup>1</sup>H NMR spectrum of **Acp-DNB**

3,5-dinitrobenzyl 1-aminocyclopropane-1-carboxylate hydrochloride (**Acp-DNB**)

<sup>1</sup>H NMR (400 MHz, DMSO) δ 8.90 (s, 3H), 8.82 (t, *J* = 2.1 Hz, 1H), 8.74 (d, *J* = 2.1 Hz, 2H), 5.47 (s, 2H), 1.54 – 1.43 (m, 4H).

Purity 99 %

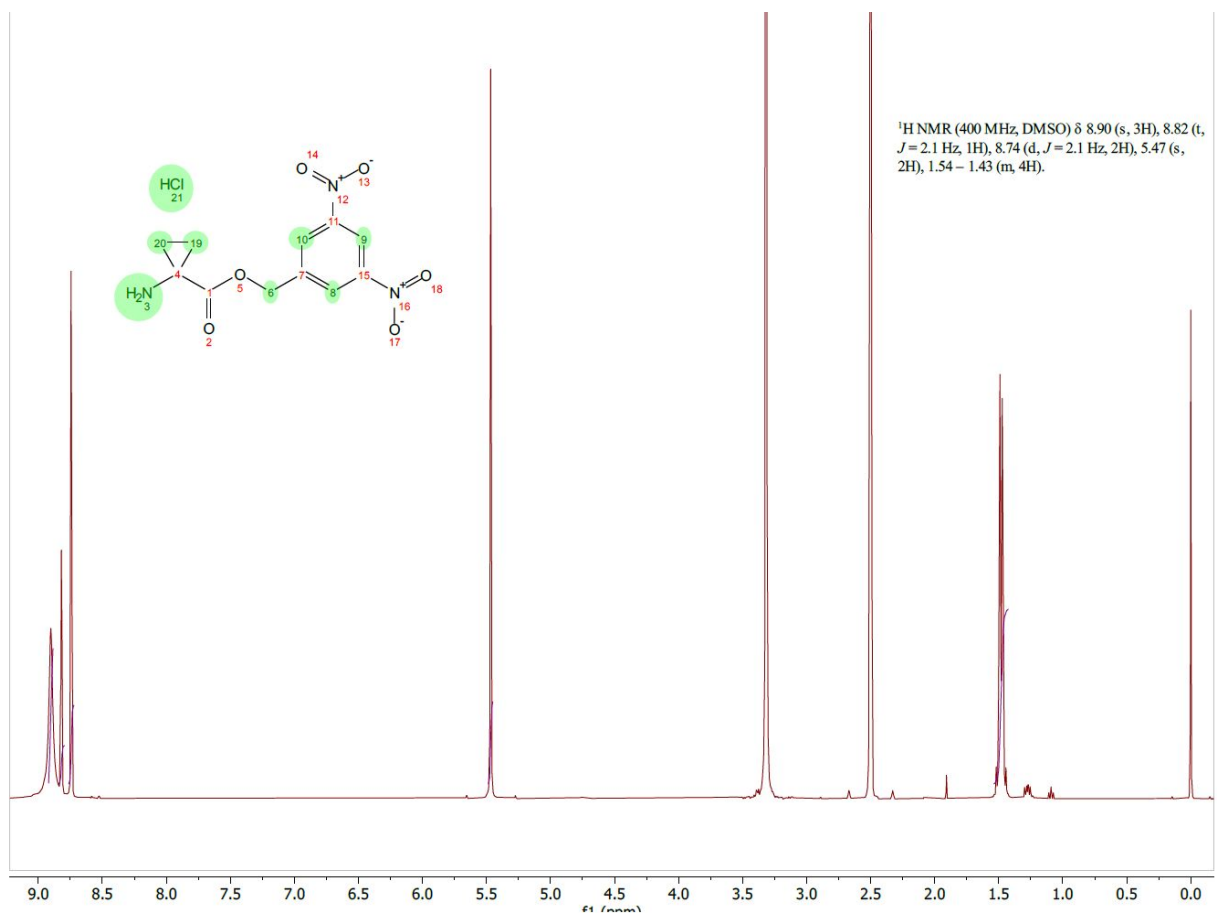



# HPLC and MS spectra of Acp-DNB

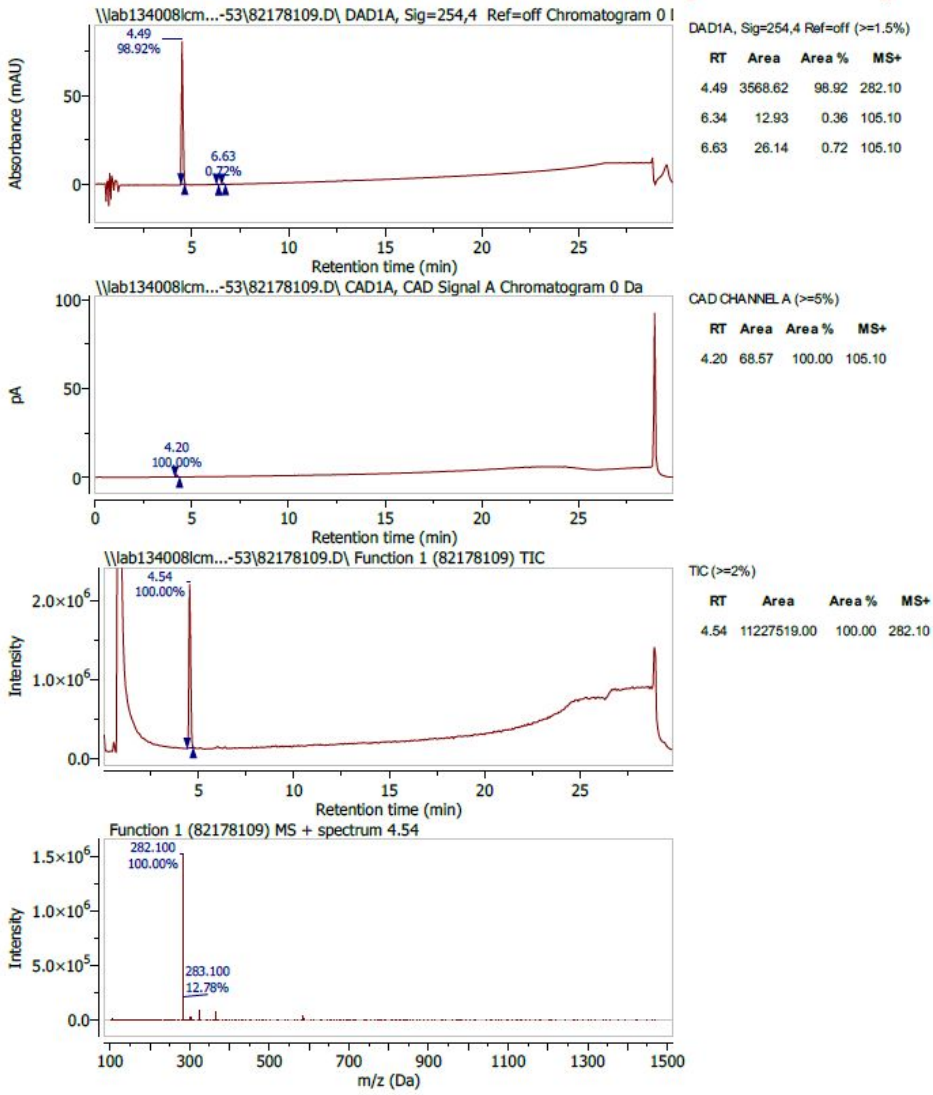

### <sup>1</sup>H NMR spectrum of **pyD-DNB**

3,5-dinitrobenzyl (S)-2-amino-4-oxo-4-(pyrrolidin-1-yl)butanoate hydrochloride (**pyD-DNB**)

<sup>1</sup>H NMR (400 MHz, DMSO) δ 8.81 (t, J = 2.2 Hz, 1H), 8.69 (d, J = 2.1 Hz, 2H), 8.26 (s, 3H), 5.52 (d, J = 13.7 Hz, 1H), 5.43 (d, J = 13.7 Hz, 1H), 4.34 (t, J = 4.6 Hz, 1H), 3.48 – 3.34 (m, 2H), 3.27 (d, J = 6.9 Hz, 2H), 3.03 (dd, J = 17.5, 5.2 Hz, 1H), 2.94 – 2.81 (m, 1H), 1.89 (p, J = 6.6 Hz, 2H), 1.78 (p, J = 6.5 Hz, 2H).

Purity 84.7 %

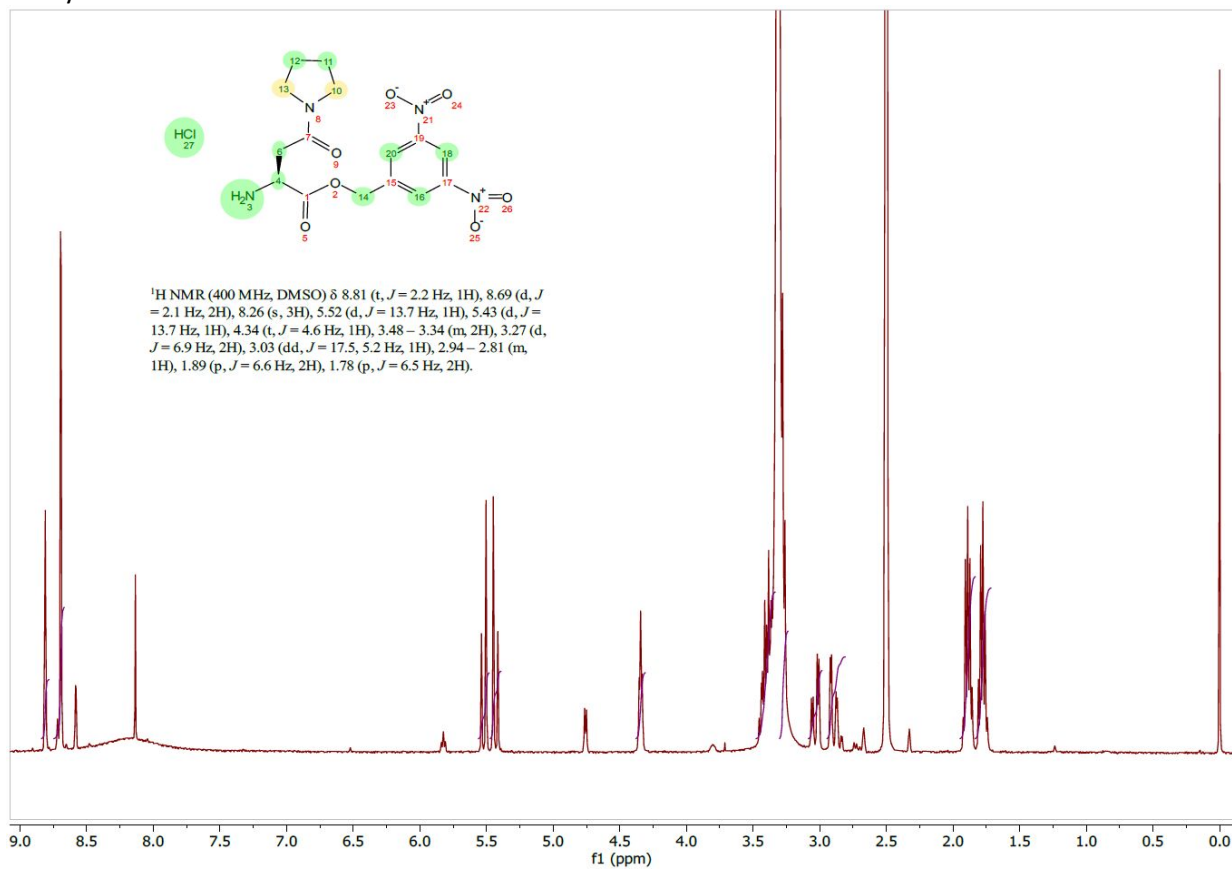

## Analytical HPLC spectrum of pyD-DNB

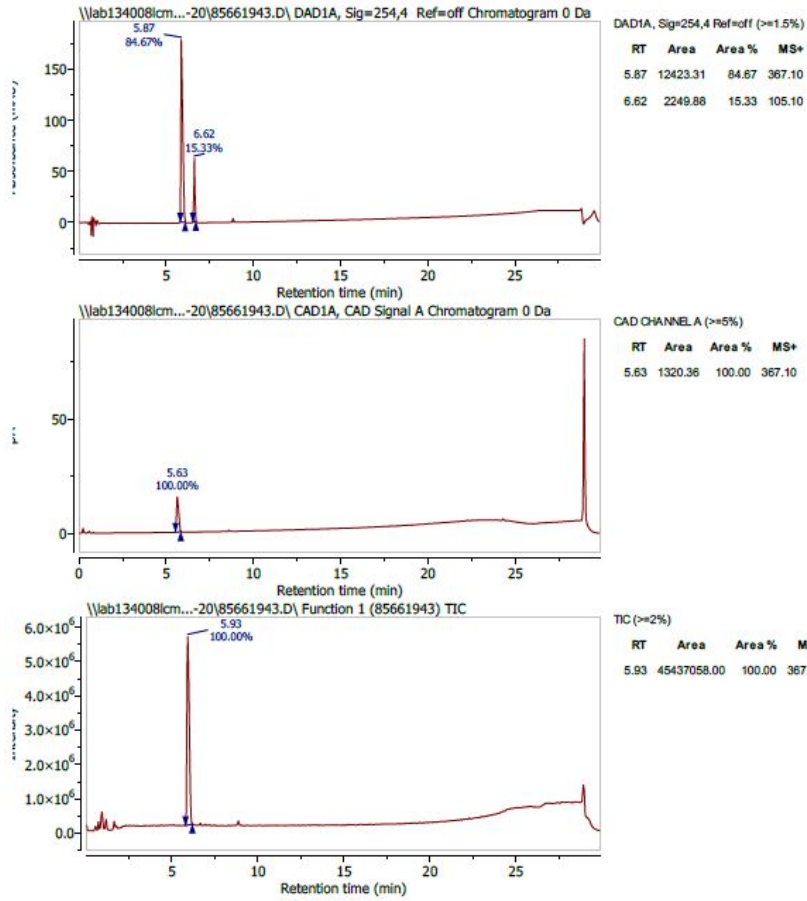

## ESI-MS spectrum of pyD-DNB

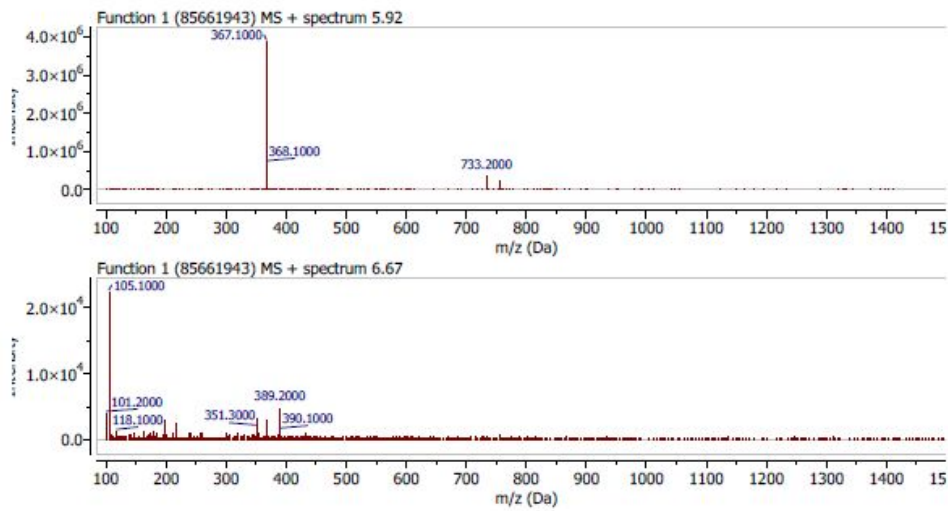

<sup>1</sup>H NMR spectrum of 3,5-dinitrobenzyl acetyl-L-alaninate (**AcA-DNB**)

<sup>1</sup>H NMR (400 MHz, DMSO) δ 8.79 (t, *J* = 2.2 Hz, 1H), 8.64 (d, *J* = 2.1 Hz, 2H), 8.39 (d, *J* = 6.6 Hz, 1H), 5.39 (s, 2H), 4.32 (p, *J* = 7.2 Hz, 1H), 1.86 (s, 3H), 1.32 (d, *J* = 7.3 Hz, 3H).

Purity 98 %

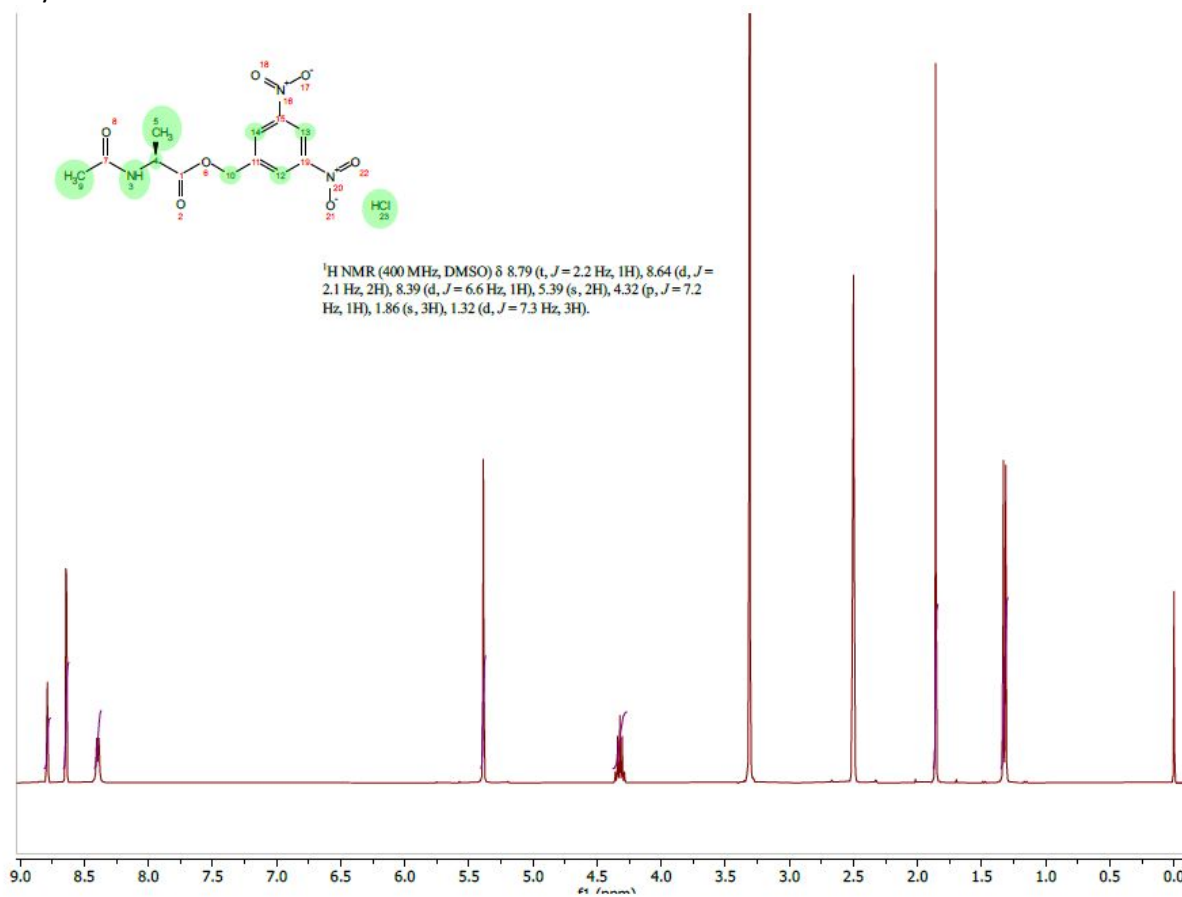

HPLC and MS spectra of **AcA-DNB**

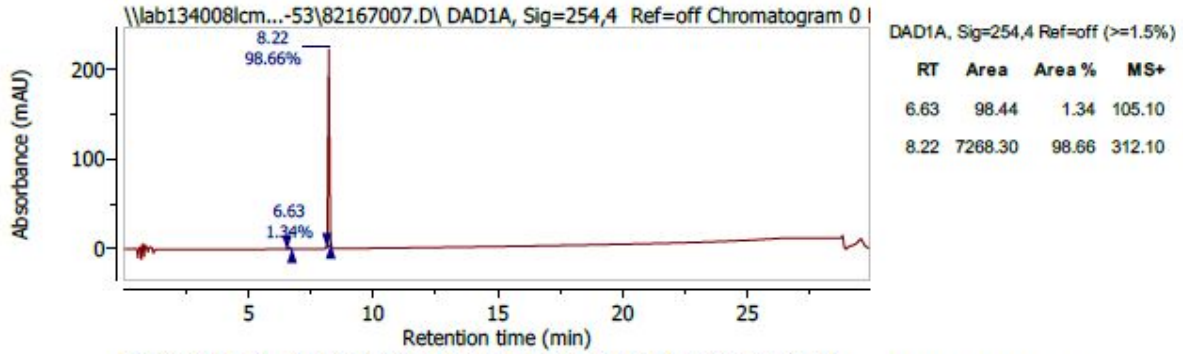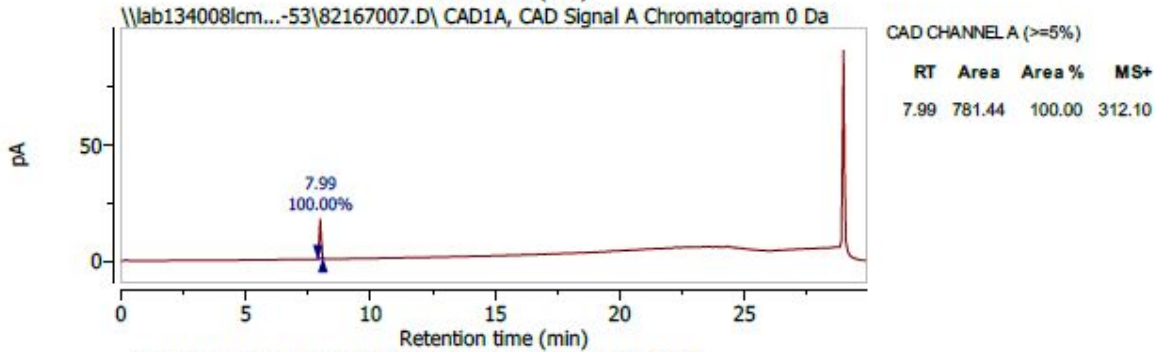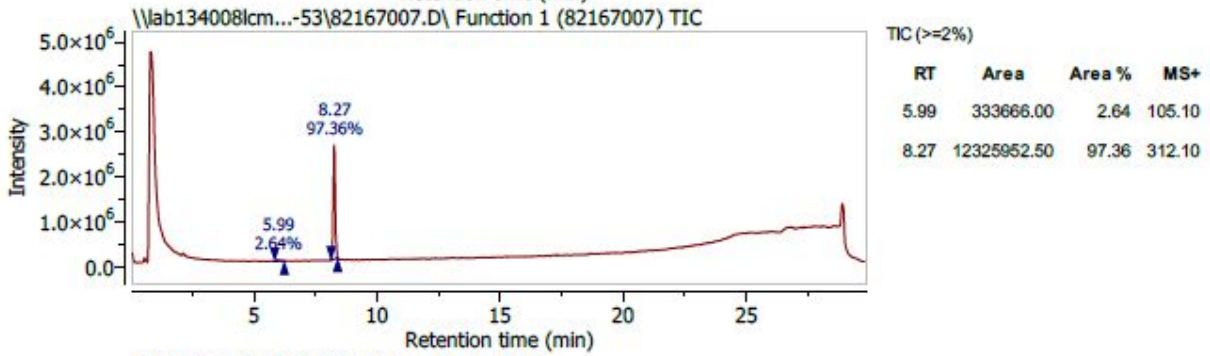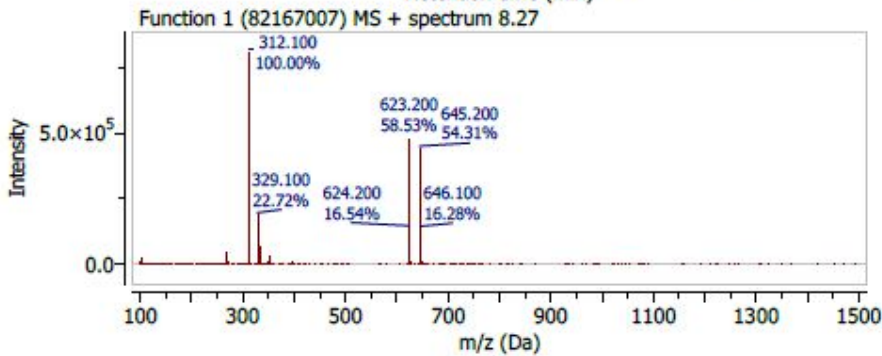

<sup>1</sup>H NMR spectrum of 3,5-dinitrobenzyl (2-chloroacetyl)carbamate hydrochloride (**ClAcA-DNB**)  
<sup>1</sup>H NMR (400 MHz, DMSO) δ 8.82 – 8.74 (m, 2H), 8.66 (d, *J* = 2.1 Hz, 2H), 5.40 (s, 2H), 4.41 (p, *J* = 7.2 Hz, 1H), 4.10 (s, 2H), 1.36 (d, *J* = 7.2 Hz, 3H).  
Purity 99 %

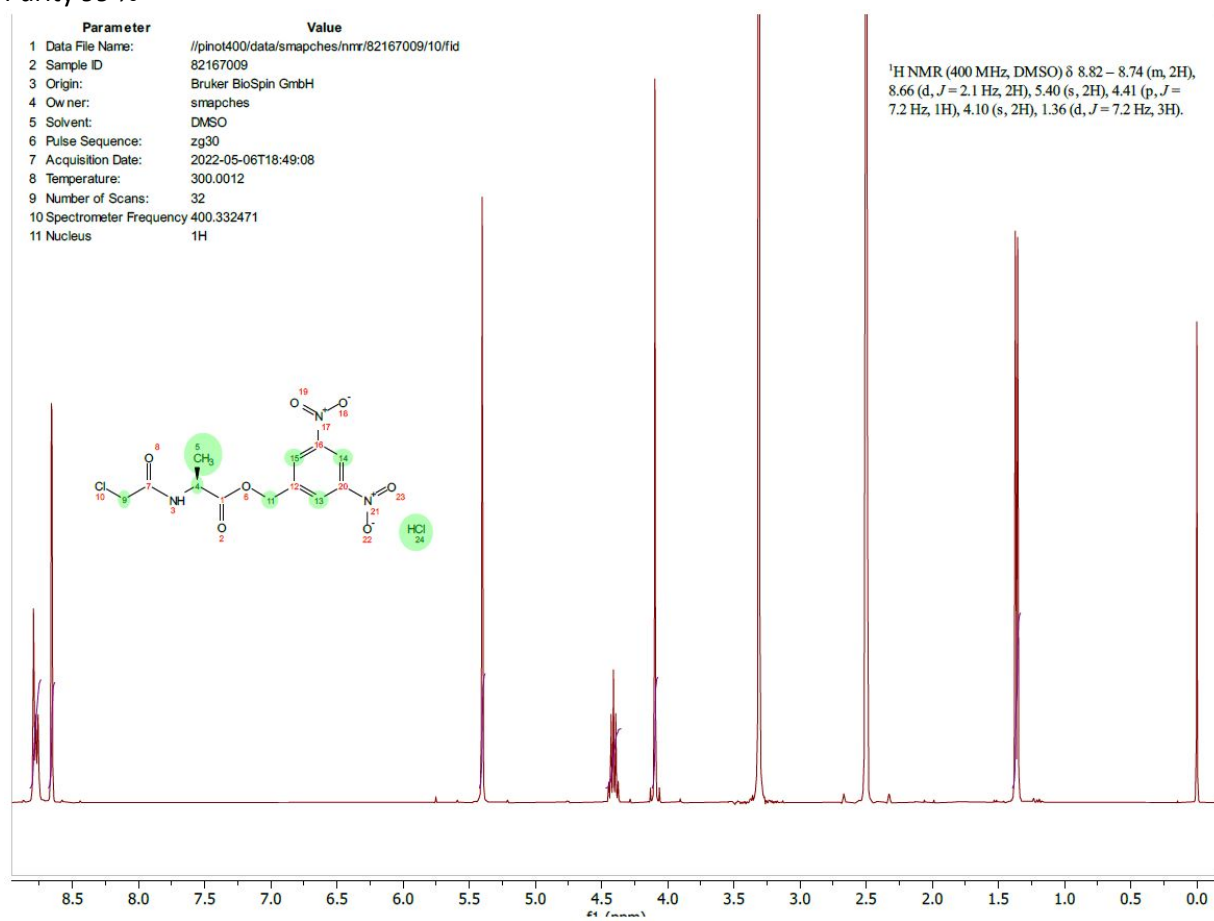

HPLC and MS spectra of **CIAcA-DNB**

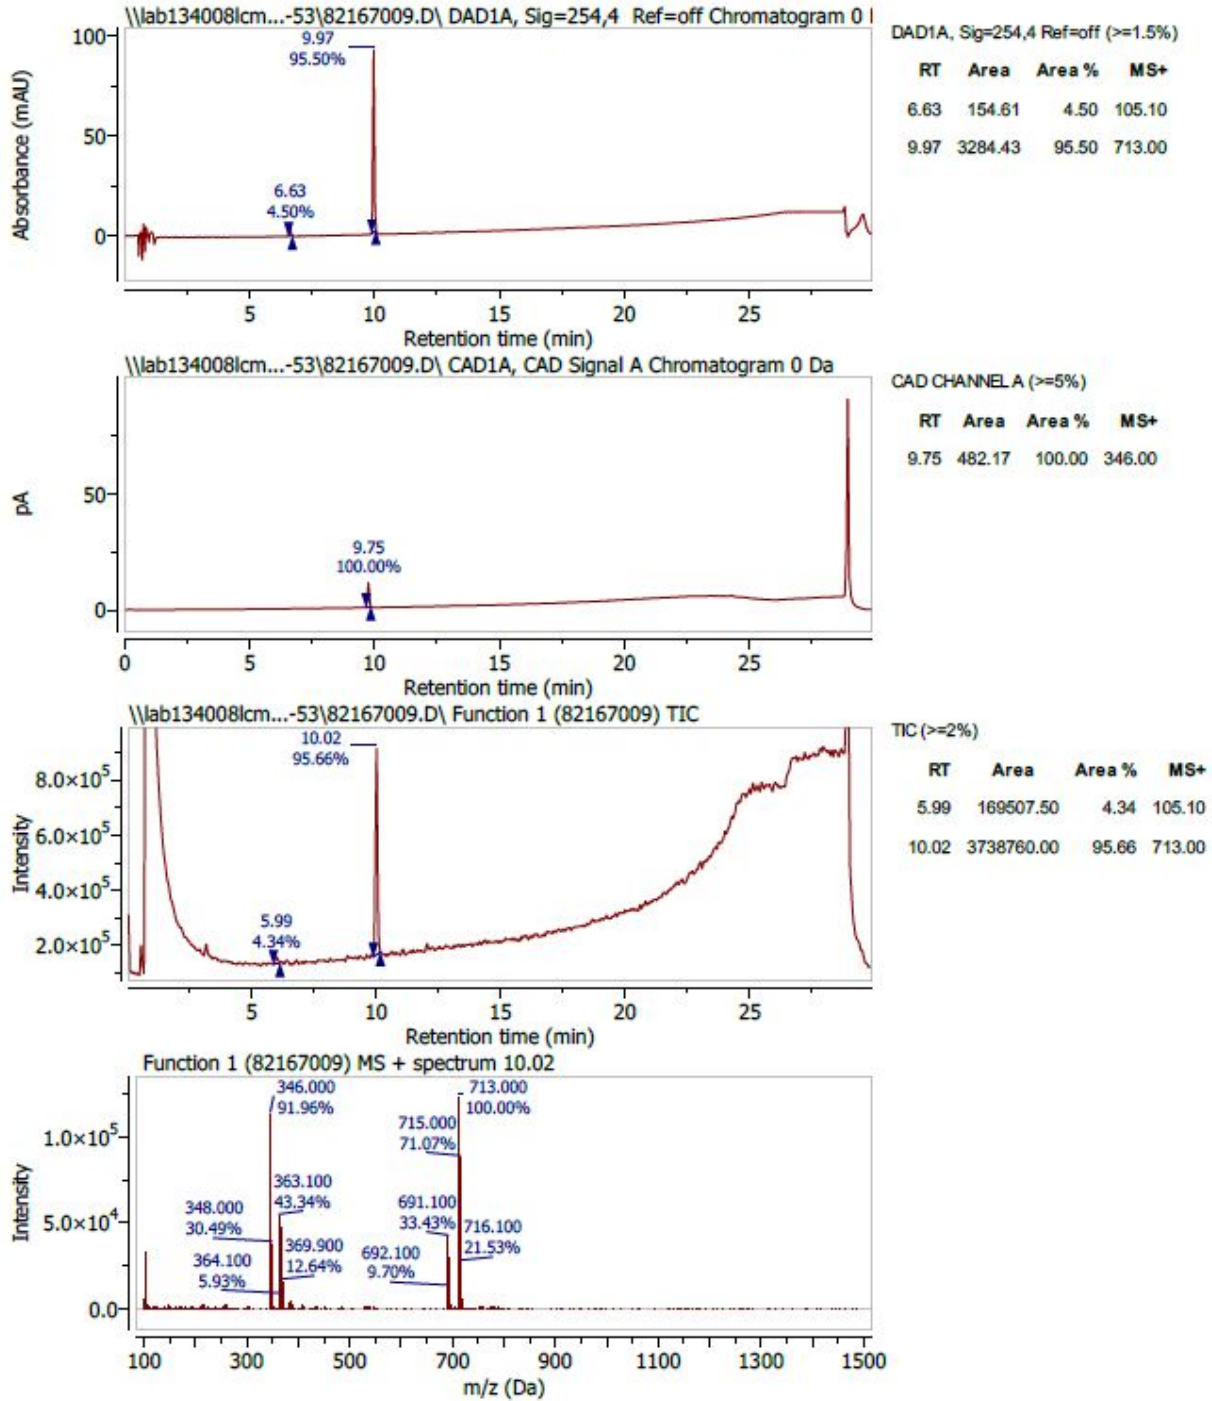

### Cyanomethyl (2-chloroacetyl)-L-tyrosinate (**ClAcY-CME**)

$^1\text{H}$  NMR (400 MHz, DMSO)  $\delta$  9.25 (s, 1H), 8.73 (d,  $J = 7.4$  Hz, 1H), 7.05 – 6.95 (m, 2H), 6.70 – 6.61 (m, 2H), 4.99 (s, 2H), 4.53 – 4.43 (m, 1H), 4.07 (s, 2H), 2.95 (dd,  $J = 13.9, 5.9$  Hz, 1H), 2.87 (dd,  $J = 13.9, 8.6$  Hz, 1H).

Purity 94.8 %

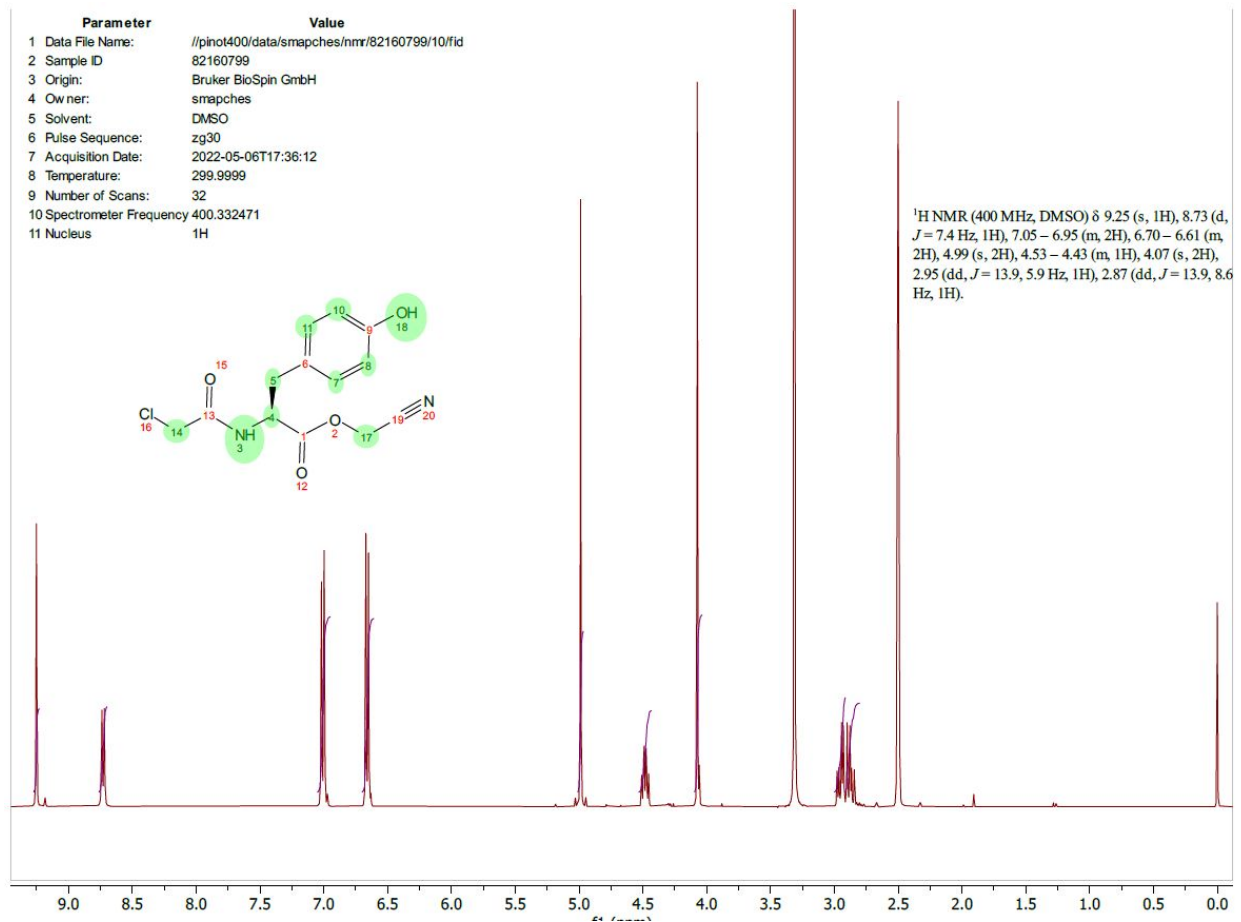



HPLC and MS spectra of **CIAcY-CME**

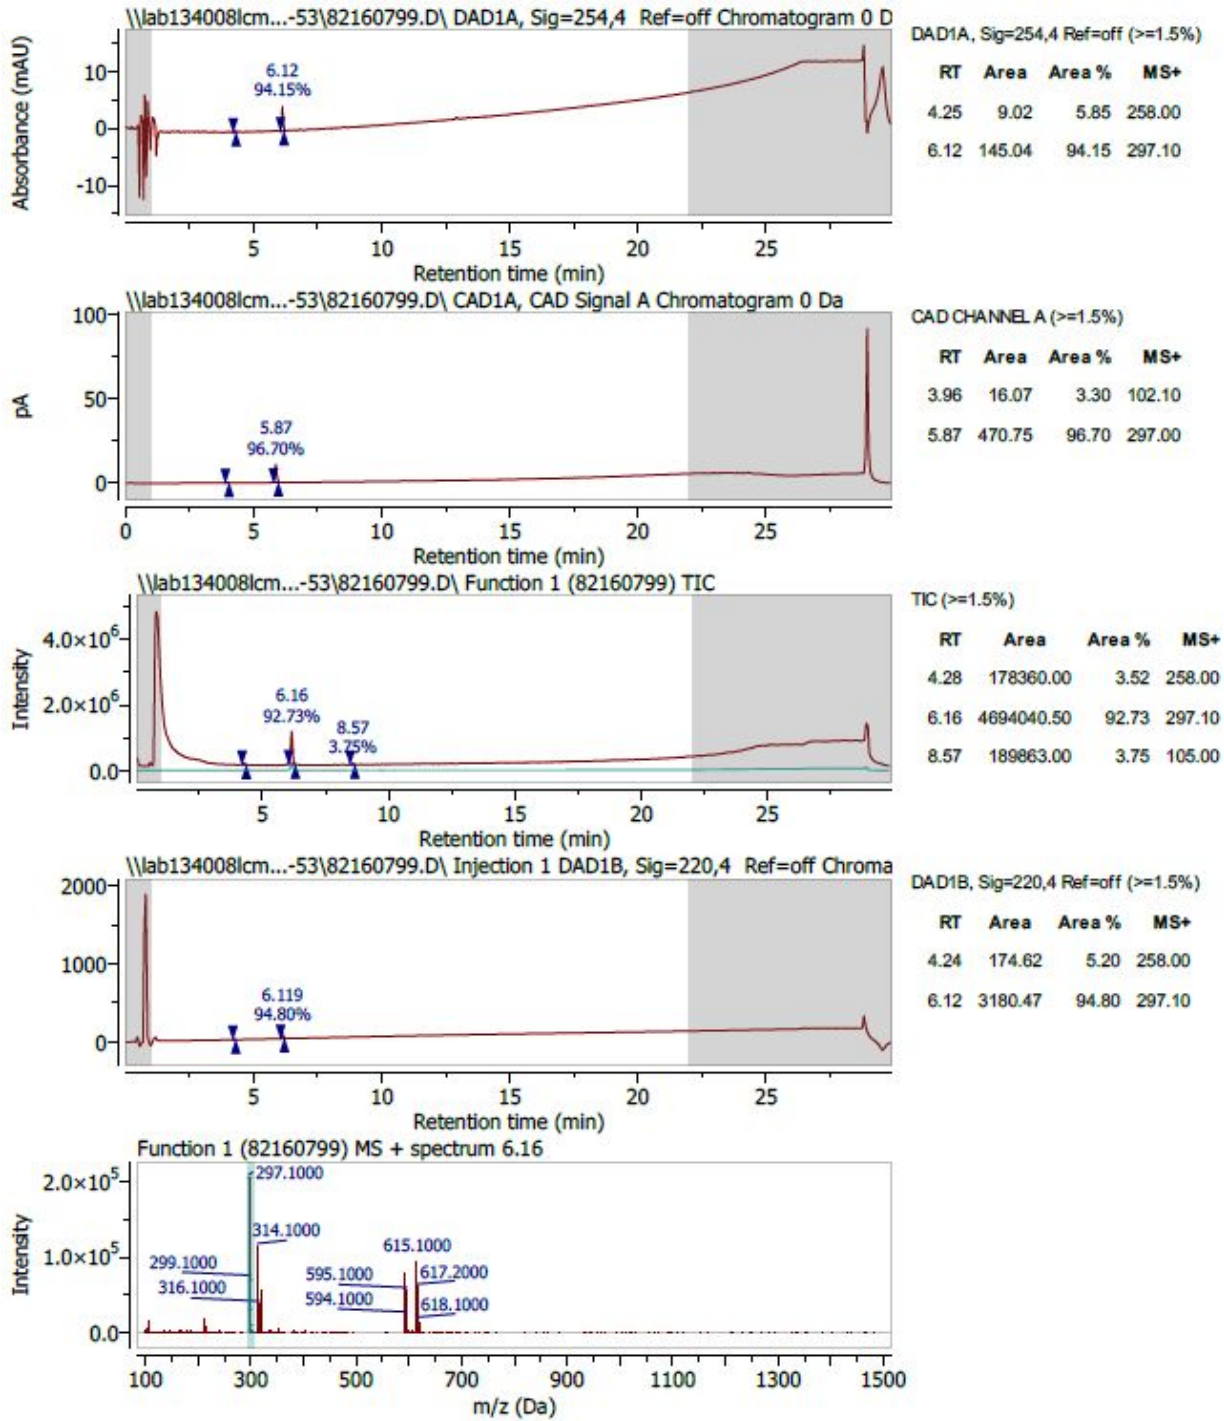

cyanomethyl (2-chloroacetyl)-D-phenylalaninate (**ClAcf-CME**)

$^1\text{H}$  NMR (400 MHz, DMSO)  $\delta$  8.80 (d,  $J = 7.4$  Hz, 1H), 7.33 – 7.18 (m, 6H), 5.00 (s, 2H), 4.58 (ddd,  $J = 9.1, 7.5, 5.7$  Hz, 1H), 4.06 (s, 2H), 3.14 – 2.93 (m, 2H).

Purity 92.5 %

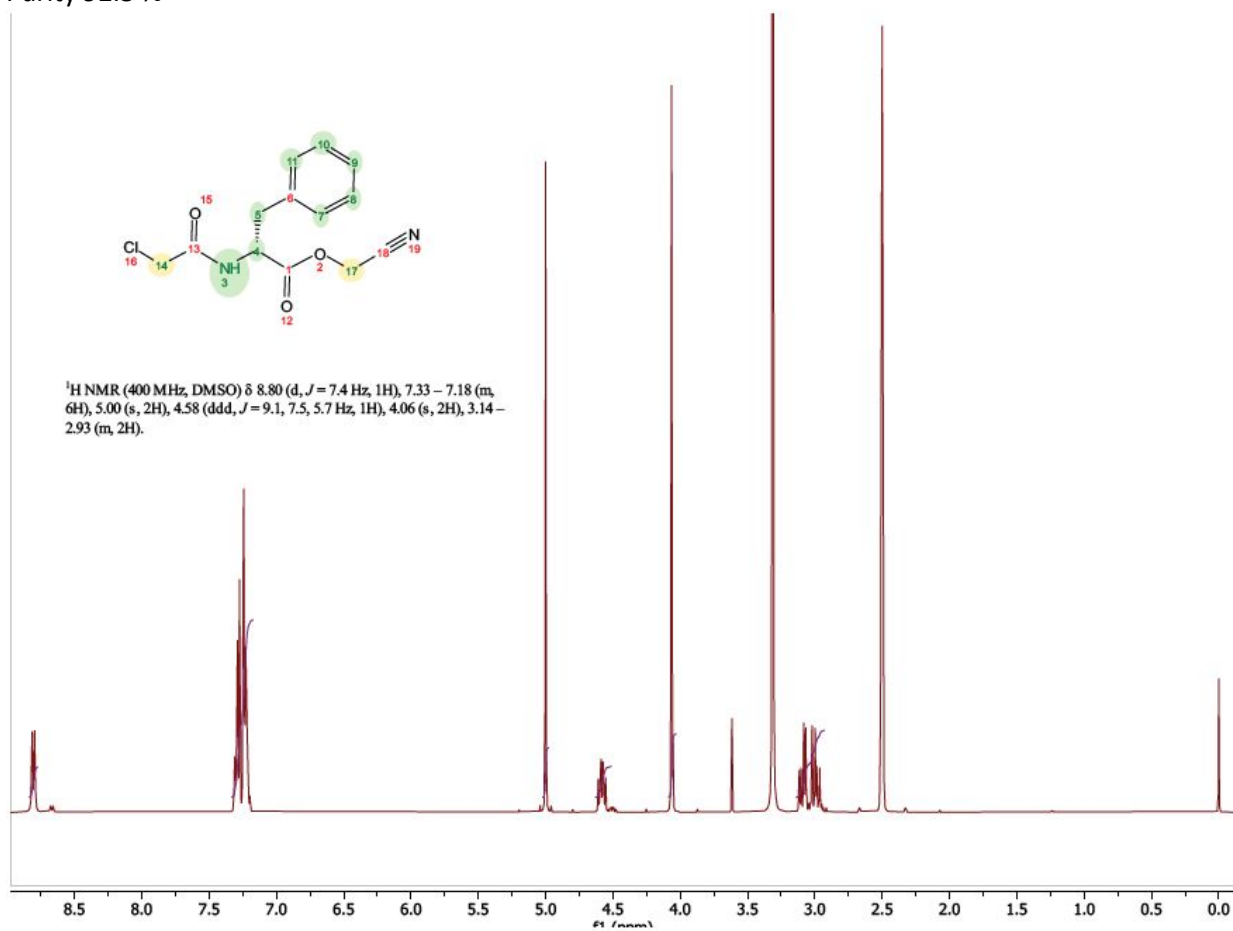

HPLC and MS spectra of **CIacf-CME**

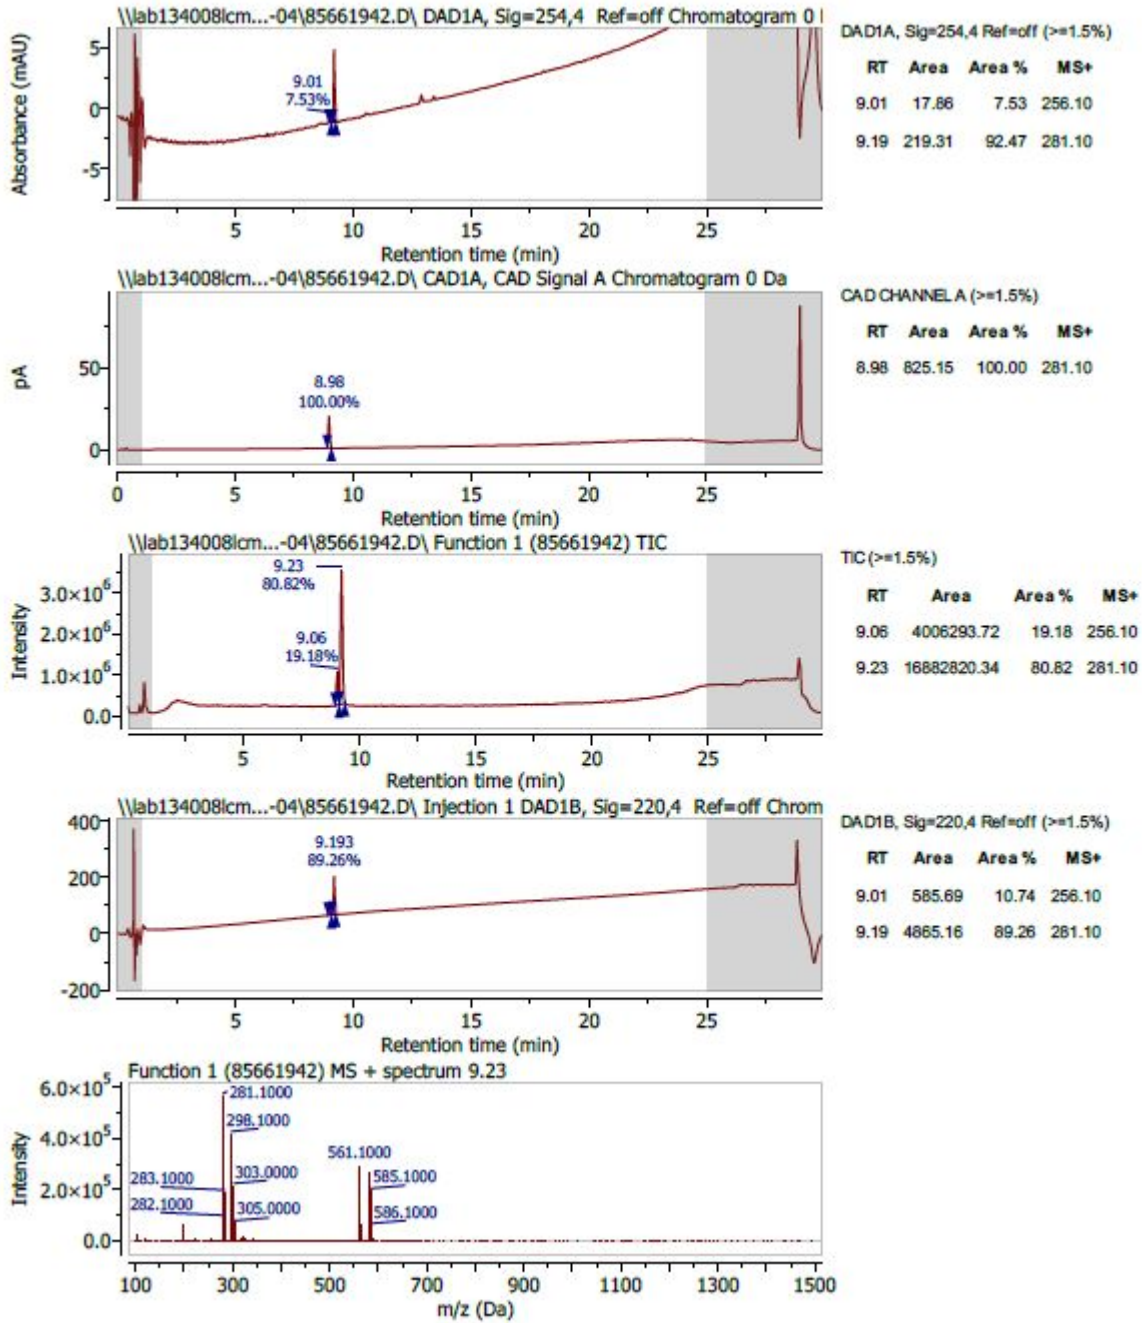

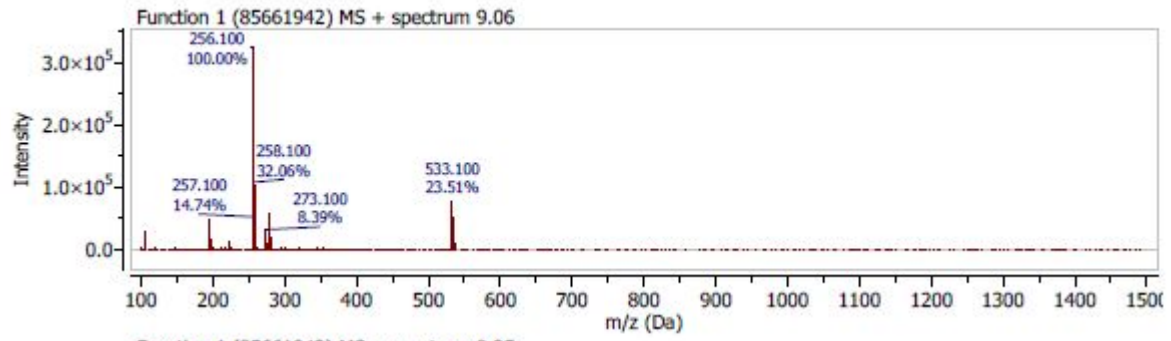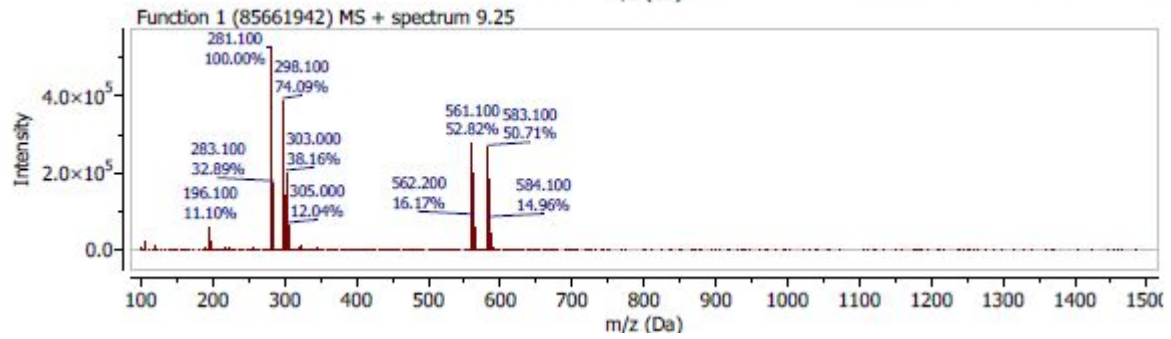

3,5-dinitrobenzyl (2-chloroacetyl)-D-alaninate hydrochloride (**ClAca-DNB**)

$^1\text{H NMR}$  (400 MHz, DMSO)  $\delta$  8.82 – 8.74 (m, 2H), 8.66 (d,  $J = 2.1$  Hz, 2H), 5.40 (s, 2H), 4.41 (p,  $J = 7.2$  Hz, 1H), 4.10 (d,  $J = 0.8$  Hz, 2H), 1.36 (d,  $J = 7.3$  Hz, 3H).

Purity 94 %

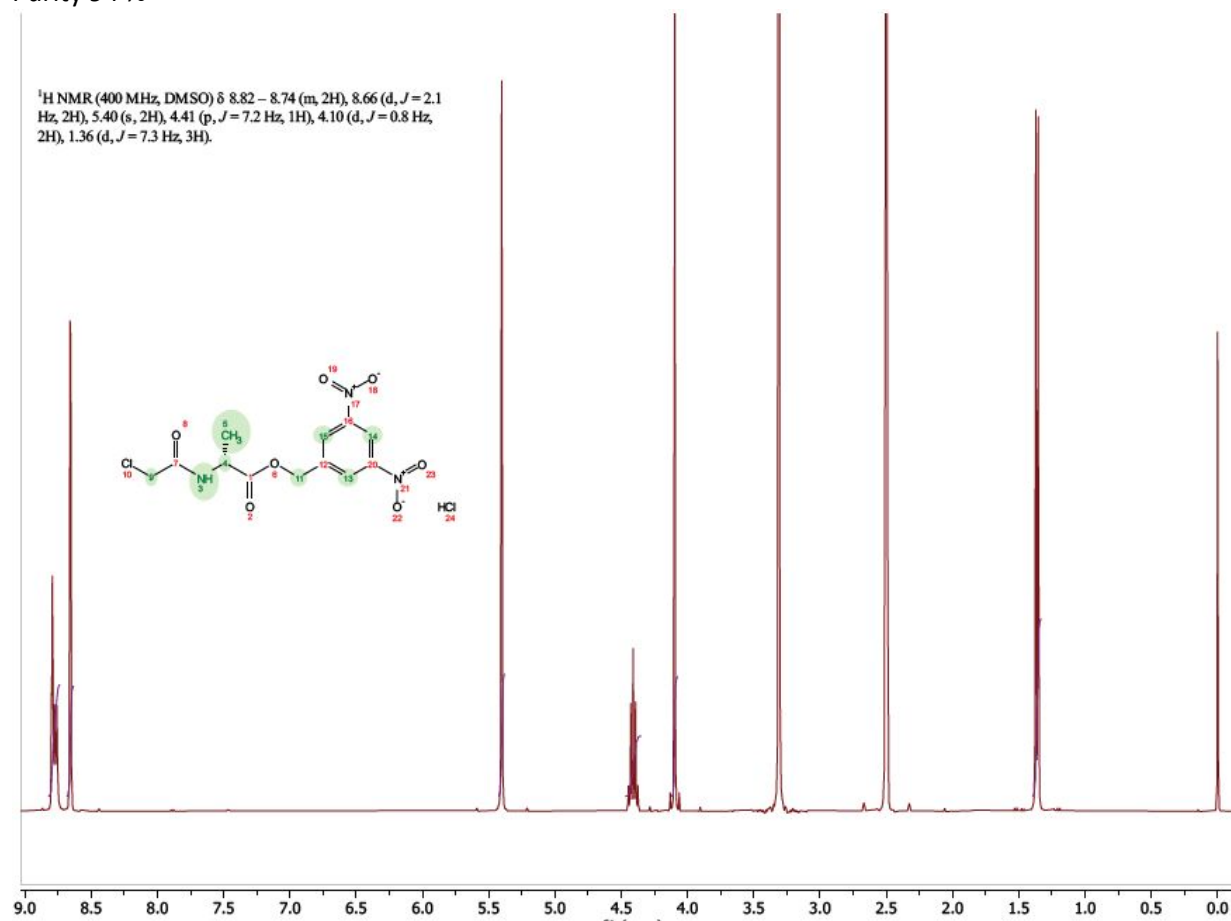

HPLC and MS spectra of (CI)Ac-DNB

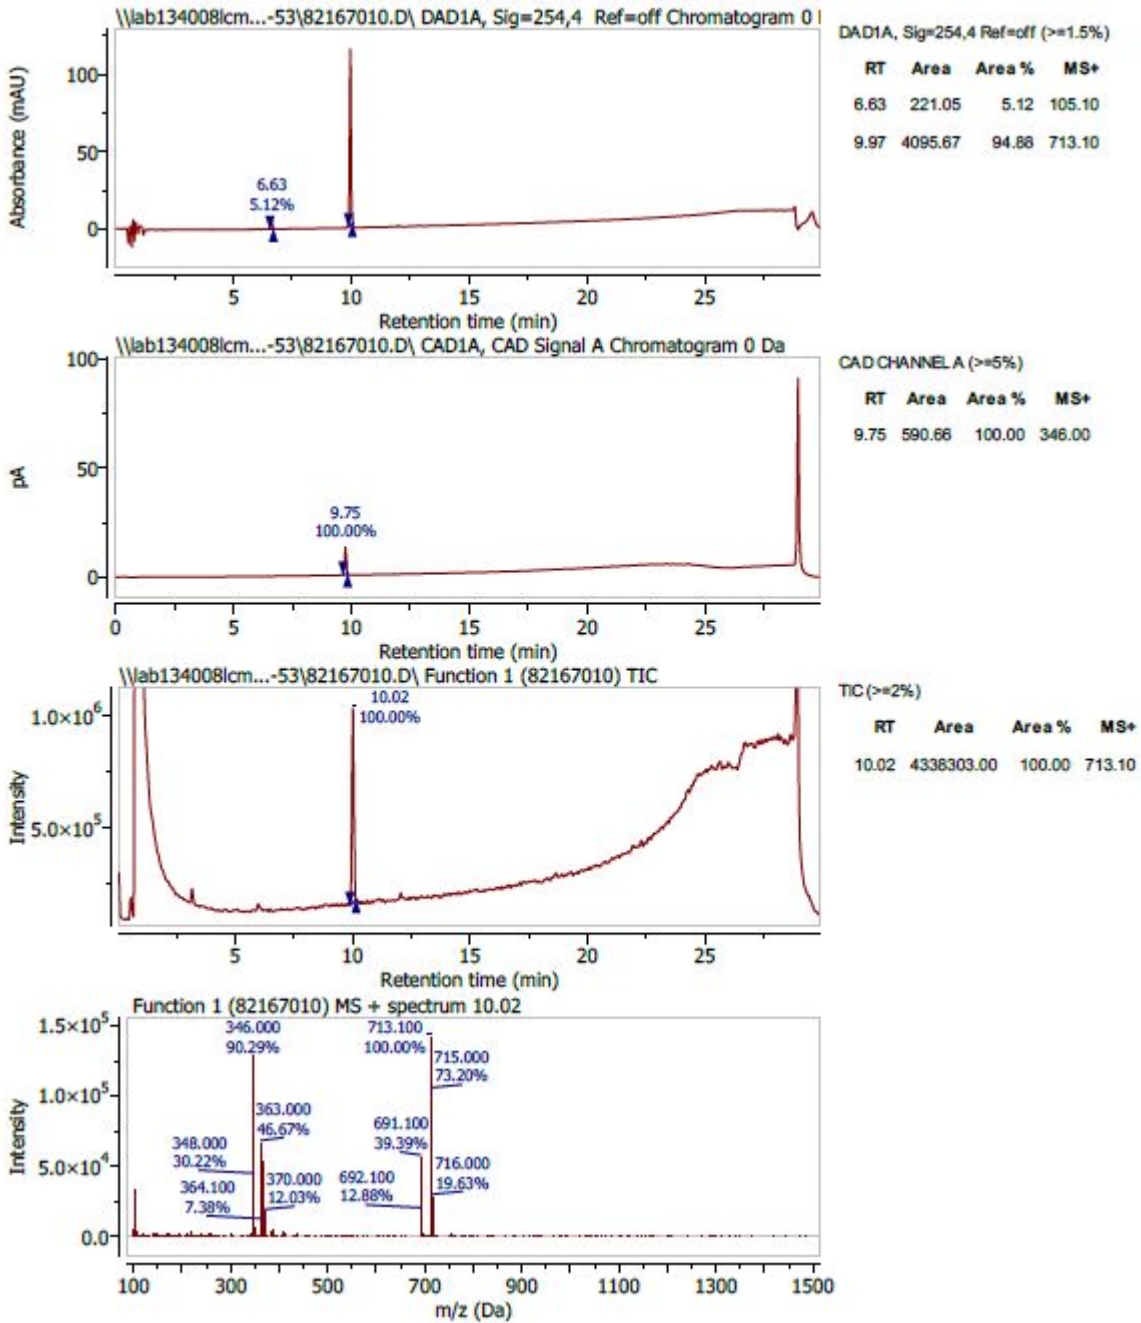

<sup>1</sup>H NMR spectrum of cyanomethyl (2-chloroacetyl)-D-tyrosinate (**ClAcy-CME**)

<sup>1</sup>H NMR (400 MHz, DMSO) δ 9.25 (s, 1H), 8.73 (d, J = 7.4 Hz, 1H), 7.05 – 6.96 (m, 2H), 6.70 – 6.61 (m, 2H), 4.99 (s, 2H), 4.53 – 4.43 (m, 1H), 4.07 (s, 2H), 2.95 (dd, J = 13.9, 6.0 Hz, 1H), 2.87 (dd, J = 13.9, 8.7 Hz, 1H).

Purity 93 %

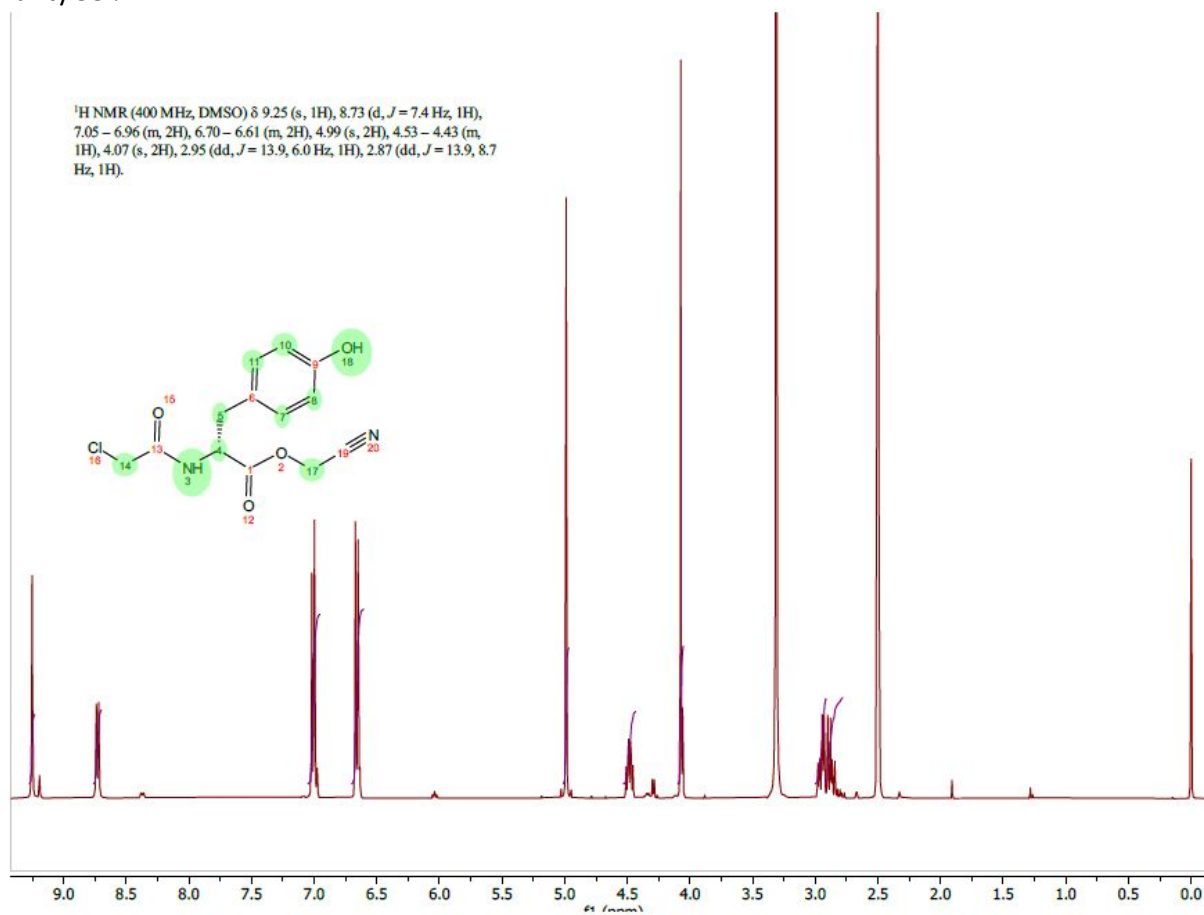

HPLC and MS spectra of **CIAcy-CME**

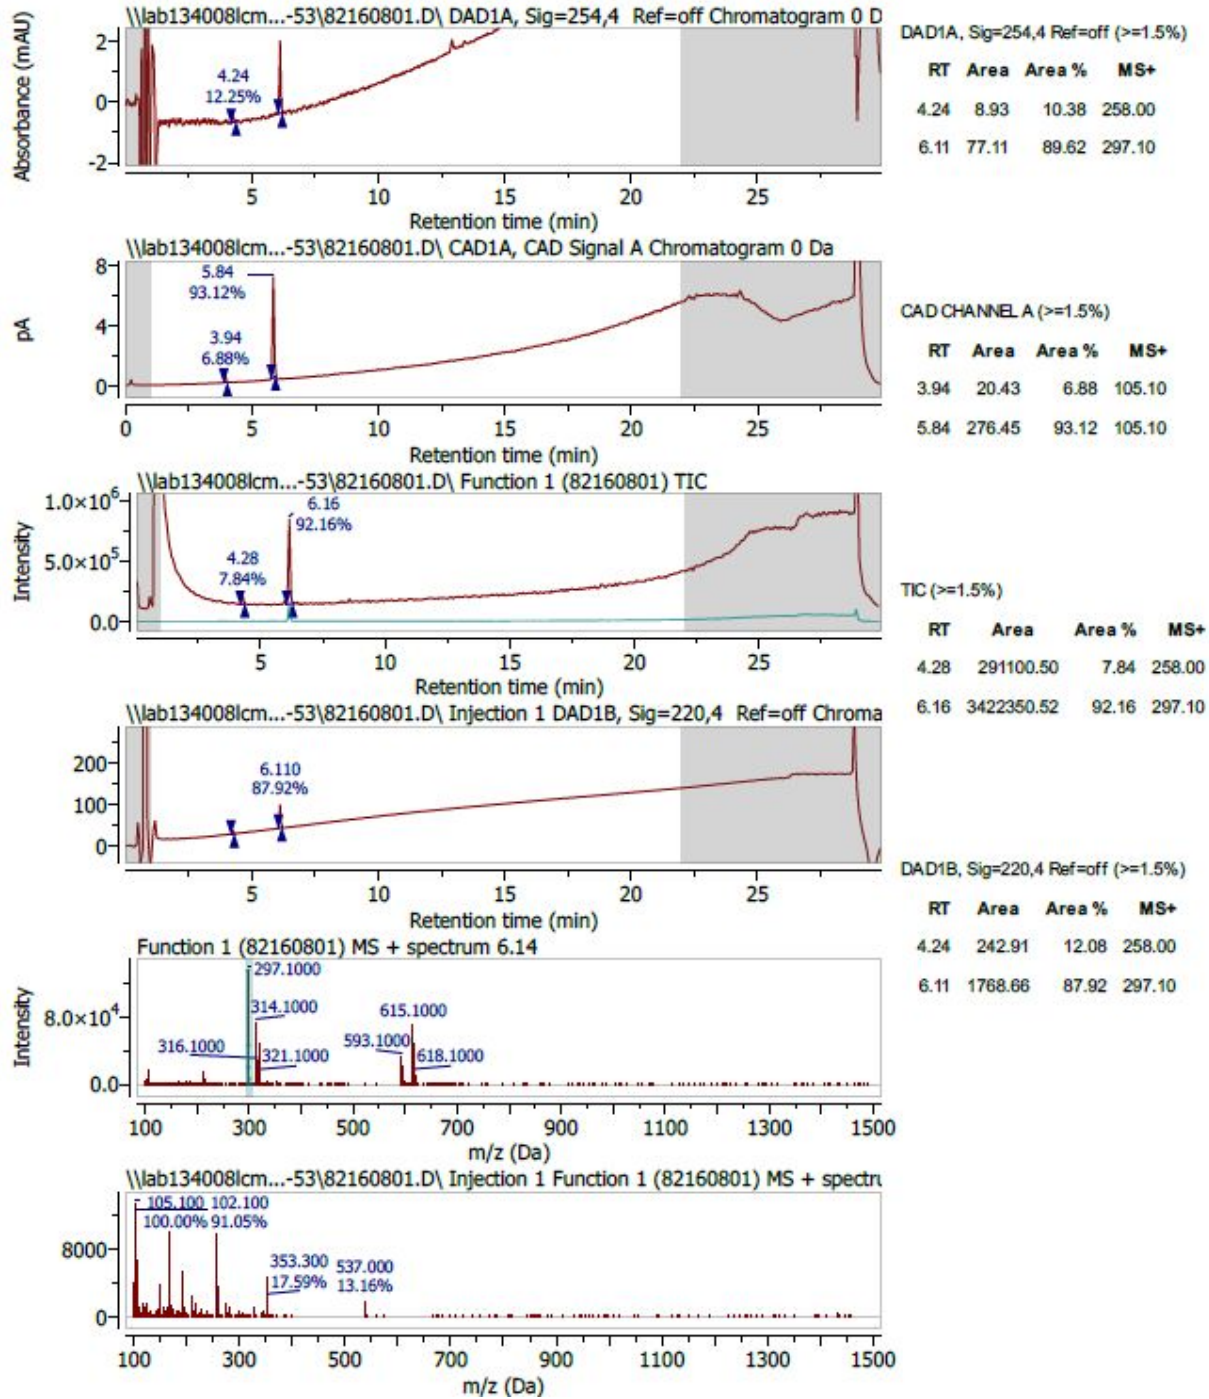



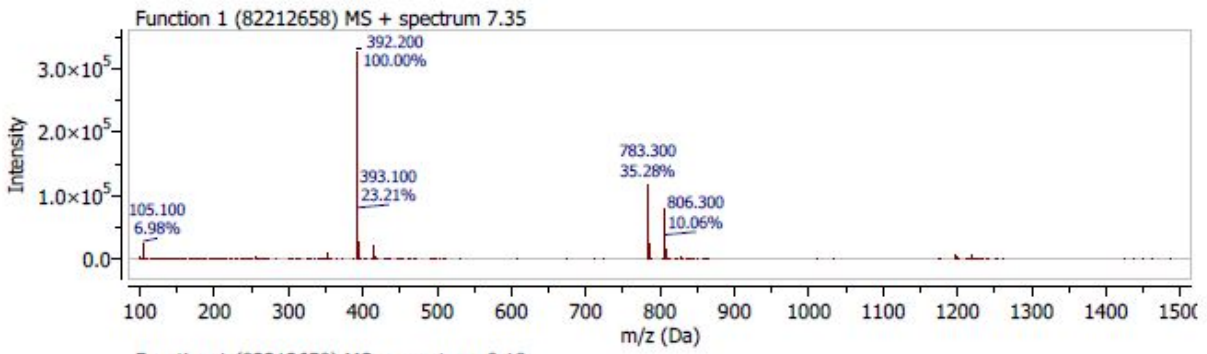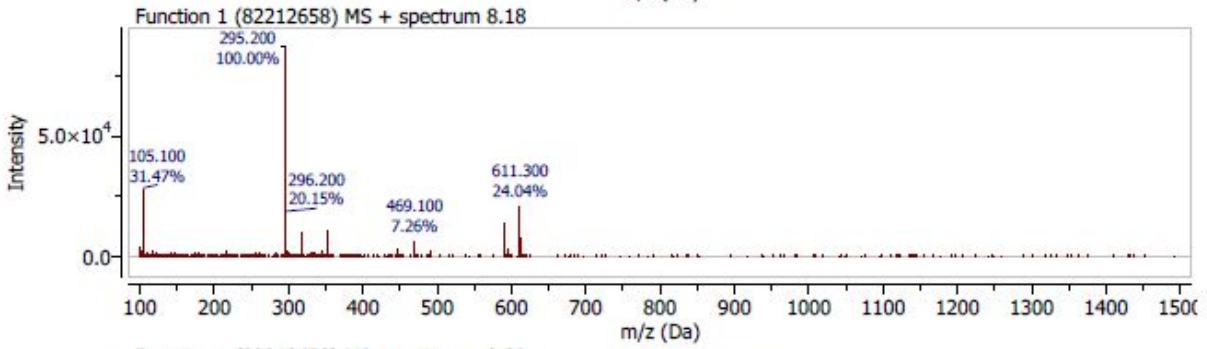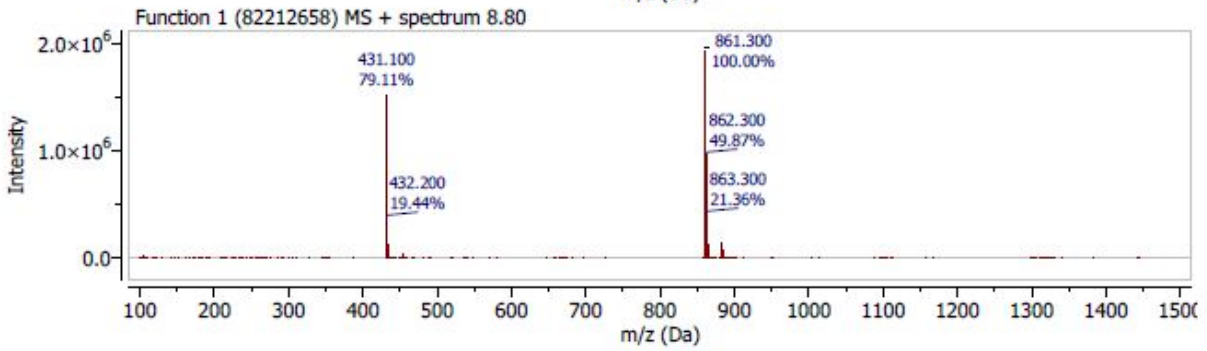

## Peptide Synthesis

**P1E** (Ac-FGGHGGHHGGGGSSKSGWRLF-acid). HPLC purity 95.3%. ESI-MS  $[M+2H]^{2+}$  calcd. 1155.1. found 1155.6.

Analytical HPLC spectrum of **P1E**

Chromatogram

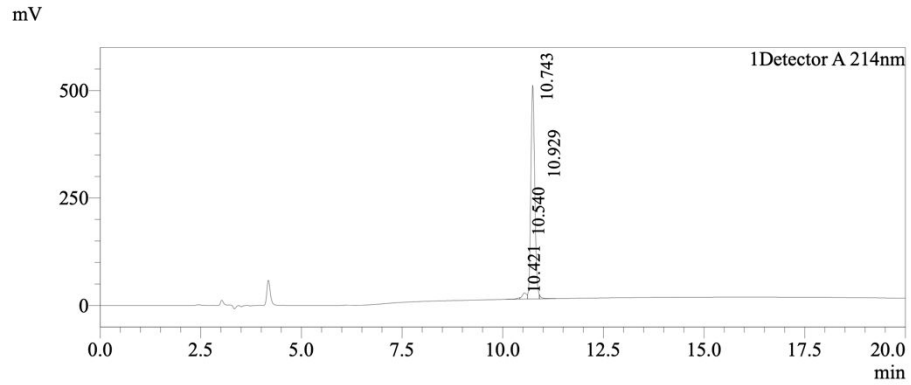

Peak Table

Detector A 214nm

| Peak# | Ret. Time | Area    | Height | Area%   |
|-------|-----------|---------|--------|---------|
| 1     | 10.421    | 22469   | 3152   | 0.638   |
| 2     | 10.540    | 112782  | 14316  | 3.204   |
| 3     | 10.743    | 3354567 | 496631 | 95.297  |
| 4     | 10.929    | 30306   | 6560   | 0.861   |
| Total |           | 3520123 | 520659 | 100.000 |

ESI-MS spectrum of **P1E**

MS Spectrum

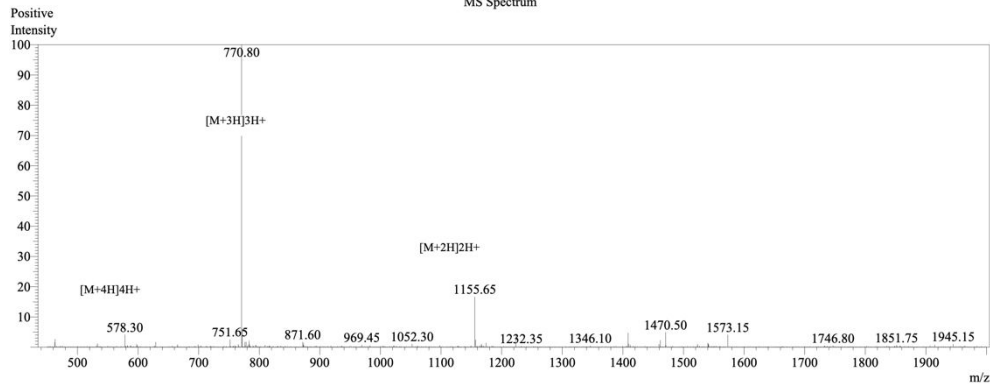

**Table S5.** Oligonucleotide sequences.

| Name            | DNA Sequence (5' → 3')                                                            |
|-----------------|-----------------------------------------------------------------------------------|
| FW              | CTAGTAATACGACTCACTATAGGGTTAACTTTAAGAAGGAGATATACATATG                              |
| S1A-re          | CGAAGCTTAGCTAATCTTCTTGAACAGCCGGCAGCCGCTCACCTTCTTACTAGATCCACCACC<br>TCC            |
| S1B-re          | CGAAGCTTACAGAATCTCCTCGAACAGCCGGTAGCCGGTCACCTTCTTACTAGATCCACCACC<br>TCC            |
| S1C-re          | CGAAGCTTACTTCTTGAACAGCCGGCAGCCGCTCTTCTTACTAGATCCACCACCTCC                         |
| S1D-re          | CGAAGCTTAGCTAATCTTCTTGAACAGCCGCTTCTTACTAGATCCACCACCTCC                            |
| S1E-re          | CGAAGCTTAGAACAGCCGGCAGCCGCTCTTCTTACTAGATCCACCACCTCC                               |
| FLAG re         | CGAAGCTTACTTGTCGTCGTCCTTGTAGTCCTTCTTACTAGATCCACCACCTCC                            |
| S1-temp         | TAAGAAGGAGATATACATATGGGTGGCCACGGTGGCCATCACGGCGGAGGTGGTGGATCT<br>AGTAAGAAG         |
| S2-temp         | TAAGAAGGAGATATACATATGGCCGGCCACGGTGGCCATCACGGCGGAGGTGGTGGATCT<br>AGTAAGAAG         |
| S3-temp         | TAAGAAGGAGATATACATATGGGTGCCACGGTGGCCATCACGGCGGAGGTGGTGGATCT<br>AGTAAGAAG          |
| S4-temp         | TAAGAAGGAGATATACATATGGGTGGCGCCGGTGGCCATCACGGCGGAGGTGGTGGATCT<br>AGTAAGAAG         |
| S5-temp         | TAAGAAGGAGATATACATATGGGTGGCCACGCCGGCCATCACGGCGGAGGTGGTGGATCT<br>AGTAAGAAG         |
| S6-temp         | TAAGAAGGAGATATACATATGGGTGGCCACGGTGCCATCACGGCGGAGGTGGTGGATCT<br>AGTAAGAAG          |
| S7-temp         | TAAGAAGGAGATATACATATGGGTGGCCACGGTGGCGCCACGGCGGAGGTGGTGGATCT<br>AGTAAGAAG          |
| S8-temp         | TAAGAAGGAGATATACATATGGGTGGCCACGGTGGCCATGCCGGCGGAGGTGGTGGATCT<br>AGTAAGAAG         |
| S9-temp         | TAAGAAGGAGATATACATATGGGTGGCCACGGTGGCCATCACGCCGGAGGTGGTGGATCT<br>AGTAAGAAG         |
| L8-temp         | TAAGAAGGAGATATACATATGNNTNNTNNTNNTNNTNNTTGGGGAGGTGGTGGAAAGTAG<br>C                 |
| L14-temp        | TAAGAAGGAGATATACATATGNNTNNTNNTNNTNNTNNTNNTNNTNNTNNTNNTTGG<br>GGGAGGTGGTGGAAAGTAGC |
| Lib HiBit217 re | CCCGCCTCCCGCCCCCGTCTCTAGAACAGCCGGCAGCCGCTCTTCTTGCTACTTCCACCACCT<br>CCCCA          |
